# Supplementary material
Source: PubMed Central journal article supplement (PMC9983685)
Supplement: NIHMS1873743-supplement-abq0762_NeolithicOrigins_Supplement.pdf [file NIHMS1873743-supplement-abq0762_NeolithicOrigins_Supplement.pdf]

## Supplementary Materials for

### Ancient DNA from Mesopotamia suggests distinct Pre-Pottery and Pottery Neolithic migrations into Anatolia

Iosif Lazaridis†, Songül Alpaslan-Roodenberg†, Ayşe Acar, Ayşen Açıkkol, Anagnostis Agelarakis, Levon Aghikyan, Uğur Akyüz, Desislava Andreeva, Gojko Andrijasevic, Dragana Antonović, Ian Armit, Alper Atmaca, Pavel Avetisyan, Ahmet İhsan Aytek, Krum Bacvarov, Ruben Badalyan, Stefan Bakardzhiev, Jacqueline Balen, Lorenc Bejko, Rebecca Bernardos, Andreas Bertatos, Hanifi Biber, Ahmet Bilir, Mario Bodružić, Michelle Bonogofsky, Clive Bonsall, Dušan Borić, Nikola Borovinić, Guillermo Bravo Morante, Katharina Buttinger, Kim Callan, Francesca Candilio, Mario Carić, Olivia Cheronet, Stefan Chohadzhiev, Maria-Eleni Chovalopoulou, Stella Chryssoulaki, Ion Ciobanu, Natalija Čondić, Mihai Constantinescu, Emanuela Cristiani, Brendan J. Culleton, Elizabeth Curtis, Jack Davis, Tatiana I. Demcenco, Valentin Dergachev, Zafer Derin, Sylvia Deskaj, Seda Devejyan, Ruben Davtyan, Vojislav Djordjević, Kellie Sara Duffett Carlson, Laurie R. Eccles, Nedko Elenski, Atilla Engin, Nihat Erdoğan, Sabiha Erir-Pazarcı, Daniel M. Fernandes, Matthew Ferry, Suzanne Freilich, Alin Frînculeasa, Michael L. Galaty, Beatriz Gamarra, Boris Gasparyan, Bisserka Gaydarska, Elif Genç, Timur Gültekin, Serkan Gündüz, Tamás Hajdu, Volker Heyd, Suren Hobosyan, Nelli Hovhannisyán, Iliya Iliev, Lora Iliev, Stanislav Iliev, İlkay İvgin, Ivor Janković, Lence Jovanova, Panagiotis Karkanás, Berna Kavaz-Kındıgılı, Esra Hilal Kaya, Denise Keating, Douglas Kennett, Seda Deniz Kesici, Anahit Khudaverdyan, Krisztián Kiss, Sinan Kılıç, Paul Klostermann, Sinem Kostak Boca Negra Valdes, Saša Kovačević, Marta Krenz-Niedbała, Maja Krznarić Škrivanko, Rovena Kurti, Pasko Kuzman, Ann Marie Lawson, Catalin Lazar, Krassimir Leshtakov, Thomas E. Levy, Ioannis Liritzis, Kirsi O. Lorentz, Sylwia Łukasik, Matthew Mah, Swapan Mallick, Kirsten Mandl, Kristine Martirosyan-Olshansky, Roger Matthews, Wendy Matthews, Kathleen McSweeney, Varduhi Melikyan, Adam Micco, Megan Michel, Lidjia Milasinovic, Alissa Mitnik, Janet M. Monge, Georgi Nekhrizov, Rebecca Nicholls, Alexey G. Nikitin, Vassil Nikolov, Mario Novak, Iñigo Olalde, Jonas Oppenheimer, Anna Osterholtz, Celal Özdemir, Kadir Toykan Özdoğan, Nurettin Öztürk, Nikos Papadimitriou, Niki Papakonstantinou, Anastasia Papathanasiou, Lujana Paraman, Evgeny G. Paskary, Nick Patterson, Ilian Petrakiev, Levon Petrosyan, Vanya Petrova, Anna Philippa-Touchais, Ashot Piliposyan, Nada Pocuca Kuzman, Hrvoje Potrebica, Bianca Preda-Bălănică, Zrinka Premužić, T. Douglas Price, Lijun Qiu, Siniša Radović, Kamal Raeuf Aziz, Petra Rajić Šikanjić, Kamal Rasheed Raheem, Sergei Razumov, Amy Richardson, Jacob Roodenberg, Rudenc Ruka, Victoria Russeva, Mustafa Şahin, Ayşegül Şarbak, Emre Savaş, Constanze Schattke, Lynne Schepartz, Tayfun Selçuk, Ayla Sevim-Erol Michel Shamoony-Pour, Henry M. Shephard, Athanasios Sideris, Angela Simalcsik, Hakob Simonyan, Vitalij Sinika, Kendra Sirak, Ghenadie Sirbu, Mario Šlaus, Andrei Soficaru,

Bilal Söğüt, Arkadiusz Sołtysiak, Çilem Sönmez-Sözer, Maria Stathi, Martin Steskal, Kristin Stewardson, Sharon Stocker, Fadime Suata-Alpaslan, Alexander Suvorov, Anna Szécsényi-Nagy, Tamás Szeniczey, Nikolai Telnov, Strahil Temov, Nadezhda Todorova, Ulsi Tota, Gilles Touchais, Sevi Triantaphyllou, Atila Türker, Marina Ugarković, Todor Valchev, Fanica Veljanovska, Zlatko Videvski, Cristian Virag, Anna Wagner, Sam Walsh, Piotr Włodarczak, J. Noah Workman, Aram Yardumian, Evgenii Yarovoy, Alper Yener Yavuz, Hakan Yılmaz, Fatma Zalzala, Anna Zettl, Zhao Zhang, Rafet Çavuşoğlu, Nadin Rohland, Ron Pinhasi, David Reich

† Co-lead authors: Iosif Lazaridis and Songül Alpaslan-Roodenberg

Correspondence to: E-mail: Iosif Lazaridis (lazaridis@genetics.med.harvard.edu), Songül Alpaslan-Roodenberg (MuyesserSongul\_Alpaslan@hms.harvard.edu), Ron Pinhasi (ron.pinhasi@univie.ac.at), David Reich (reich@genetics.med.harvard.edu)

**This PDF file includes:**

Materials and Methods (p. 3)

Supplementary Text:

S1: The Near Eastern Neolithic Continuum ..... 4

Tables S1 to S5

References 1-36 (pp. 19-20)

## **Materials and Methods**

The materials and methods of this paper were shared across it and two other studies (12, 26) and to avoid duplication are described uniquely in the Supplementary Information of (12).

## S1: The Near Eastern Neolithic Continuum

In this section we perform qpWave/qpAdm analysis(29) in order to study the formation of Neolithic populations in West Eurasia and in particular to place the new Neolithic data from Albania, Armenia, Cyprus, Iraq, and Turkey in the context of other known Neolithic populations. We use a set of 9 ‘right’ outgroups:

Mbuti.DG(30), CHG(31), EHG(2, 18), ISR\_Natufian\_EpiP(1), MAR\_Taforalt\_EpiP(32), RUS\_AfontovaGora3(33), SRB\_Iron\_Gates\_HG(19), TUR\_Pınarbaşı\_EpiP(6), WHG(17, 31, 33, 34)

This set includes an African outgroup (Mbuti), pre-Neolithic hunter-gatherers from mainland Europe (WHG), eastern Europe (EHG), Siberia (AfontovaGora3), and the Caucasus (CHG), Epipaleolithic hunter-gatherers from Anatolia (Pınarbaşı), the Levant (Natufians), and North Africa (Taforalt). (We note that the WHG group includes Loschbour, Villabruna, LaBrana1, and Bichon, EHG the two hunter-gatherers from Karelia and one from Samara(2, 18), and CHG two hunter-gatherers from Kotias and Satsurblia caves in Georgia).

This set of outgroups is conservative in the sense that it avoids the use of any Neolithic populations themselves, and consists only of pre-Neolithic hunter-gatherers from Europe, the Near East and North Africa (plus the Central African outgroup). Outgroups more closely intertwined with the phylogeny of the modeled population have increased power to determine its origins, but this comes at a cost of potential gene flow from it to the outgroups. By choosing the conservative set of outgroups we eliminate this possibility and thus model rejections (which occur when the relationship between the modeled Test population and the outgroups is not wholly mediated via the Sources) clearly signify that the Test population cannot indeed be modeled in a proposed way.

We use a set of 20 candidate Source populations:

ARM\_Aknashen\_N (this study), ARM\_Masis\_Blur\_N (this study), AZE\_N(7), CHG, CYP\_PPNB (this study), EHG, IRN\_Ganj\_Dareh\_N(1), ISR\_Natufian\_EpiP(1), Levant\_PPN(1), Mesopotamia\_PPN (this study, combining IRQ\_Nemrik9\_PPNA and the TUR\_SE\_Mardin\_PPN population from the Boncuklu Tarla site), MAR\_Taforalt\_EpiP(35), RUS\_AfontovaGora3(33), RUS\_MA1\_HG(36), SRB\_Iron\_Gates\_HG(19), TUR\_C\_AşıklıHöyük\_PPN,(8) TUR\_C\_Boncuklu\_PPN(6), TUR\_C\_Çatalhöyük\_N,(8) TUR\_Marmara\_Barçın\_N(2), TUR\_Pınarbaşı\_EpiP(6), WHG

Two sets of individuals were published from the Boncuklu PPN site from Central Anatolia(5, 6) and we use the 1240K capture data of (6) to represent this population.

The Sources include all of the ‘right’ outgroups (except the right basis population Mbuti). They also include additional Neolithic source populations from the Near East, including new Neolithic populations of our study. The Levant\_PPN and Mesopotamia\_PPN populations include samples from multiple countries: Israel and Jordan for the Levant and Nemrik9 from Iraq and Mardin (Boncuklu Tarla) from SE Turkey for Mesopotamia.

We use a set of 15 Test populations, which includes all the new Neolithic populations from our study

ALB\_N, ARM\_Aknashen\_N, ARM\_Masis\_Blur\_N, AZE\_N, CYP\_PPNB, IRN\_Ganj\_Dareh\_N, IRQ\_Bestansur\_PPN, IRQ\_Shanidar\_N, Levant\_PPN, Mesopotamia\_PPN, TUR\_C\_AşıklıHöyük\_PPN, TUR\_C\_Boncuklu\_PPN\_Feldman, TUR\_C\_Çatalhöyük\_N, TUR\_Marmara\_Barçın\_N, and IRQ\_Nemrik9\_LBA (a late 3<sup>rd</sup> millennium BCE individual from Nemrik9 that is the only post-Neolithic individual from Iraq and clusters with the earlier PPN ones),

We try to fit models for each Test population as a mixture of  $K=1, 2$  from the sources. In Table S 1 and Table S 2 that follow we list feasible models (mixture proportions within  $[0, 1]$  interval and  $p$ -value for rank  $K-1 \geq 0.01$ )

The inclusion of new Neolithic populations of our study as well as previously published ones in both Test and Sources helps us avoid “publication order bias”, i.e., the potential pitfall of trying to fit newly published samples as mixtures of previously published ones rather than considering all samples de novo on an equal footing.

Below, we describe how each Test population can be modeled.

### Modeling of Test Neolithic populations

#### *Neolithic Albania (ALB\_N; this study)*

The Neolithic of Albania is represented by individual I15705 (6223-6067 calBCE) and can be modeled as a simple clade (Table S 1) with the Northwest Anatolian Neolithic of Barçın, and the Central Anatolian Neolithic of Aşıklı Höyük and Çatalhöyük as well as the PPN of Cyprus, which as we shall see is a related population to the Anatolian farmers. The Neolithic sample from Masis Blur in Armenia and the Epipaleolithic sample from Pınarbaşı in Turkey can also be sources for this population, albeit with low  $p$ -values; our inability to reject these latter two models at high statistical significance may reflect loss of power for these source populations consisting of single individuals.

Overall, we conclude that the single individual of the Neolithic of Albania was NW Anatolian-like, and similar to other early farmers from southeastern Europe.(2, 4) Interesting models not listed in the Tables include WHG or SRB\_Iron\_Gates\_HG as a 2<sup>nd</sup> source to complement the NW Anatolian Neolithic. The proportion of Anatolian Neolithic ancestry in these models is estimated as  $103 \pm 2.2\%$  and  $102 \pm 2.5\%$  respectively, suggesting that there is no evidence for absorption of European hunter-gatherer ancestry in Albania, part of a general pattern of lack of such hunter-gatherer ancestry in the South Balkans, which we also discuss in terms of the main 5-way model of (12).

#### *Neolithic South Caucasus (Armenia: ARM\_Aknashen\_N and ARM\_Masis\_Blur\_N, this study; Azerbaijan(7): AZE\_N)*

The two newly reported Neolithic individuals from Armenia in the 6<sup>th</sup> millennium BCE can be modeled with each other as a source ( $p=0.059$ ) and also with AZE\_N as a source, and all South Caucasus Neolithic populations can be modeled with Mesopotamia\_PPN as a source, complementing the picture from PCA (Fig. 2) that all these samples cluster broadly together in the context of West Eurasian variation. The Masis Blur individual can also be modeled well ( $p=0.56$ ) as deriving from the PPN population of Aşıklı Höyük in Central Anatolia, while this source is less convincing for the Aknashen individual ( $p=0.018$ ).

Given that the p-value of many of the 1-way models are rather close to the 0.01 cutoff, we also examined 2-way models (Table S 2). When we model the Aknashen individual as one other Neolithic population (Anatolian or Levantine) plus CHG, the mixture proportion for CHG ancestry is positive, suggesting that greater CHG-related ancestry is what differentiates this individual from other Neolithic populations of the Near East. The Masis Blur individual, more “southern” in the PCA, can be modeled as a mixture of the Aknashen one with extra Levantine ancestry. Comparing both individuals from Armenia using Anatolian Neolithic as one source and CHG as the other, we observe that the CHG ancestry is higher in the Aknashen one.

Given that the Aknashen individual is earlier (5985-5836 calBCE) than the one from Masis Blur (5633-5532 calBCE), and considering that it is differentiated from it in a greater CHG/less Levantine ancestry direction, it is possible to interpret these results as pointing to the Masis Blur individual belonging to a later or perhaps a transient population, as it also stands apart from the entirety of the (later) time series of samples from Armenia in its more “southern” tendency. The samples from Azerbaijan can be modeled as mixtures of these two extrema (albeit with high standard errors); they date from ~5700-5400BCE and are thus roughly contemporaneous. In sum, the Neolithic data from the South Caucasus point to the presence there of higher CHG-related ancestry compared to other areas of the Southern Arc to the west and south, and the presence of some variability suggesting “southern” admixture exemplified by the Masis Blur individual.

#### *Pre-Pottery Neolithic Cyprus (CYP\_PPNB; this study)*

The PPN population of Cyprus can be modeled as a clade with that of NW and Central Anatolia (Table S 1), but with a positive coefficient of ancestry from Levantine (PPN or Natufian) sources when considering two-way models. This pattern is also evident in the main 5-way model of (12). Thus, while Cyprus is geographically intermediate between the Levant and Anatolia, its PPN population is more related to that of Anatolia than the Levant, although the pattern seems possibly consistent with ancestry from both sources. However, when modeling the PPN of Cyprus as a mixture of the Aşıklı Höyük PPN population from Central Anatolia and Levantine PPN, only a non-significant  $6.8 \pm 4.2\%$  of the latter is estimated, so overall, we can say that the PPN of Cyprus resembled that of the PPN of the Anatolian mainland to the north.

#### *Zagros (IRQ\_Bestansur\_PPN, IRQ\_Shanidar\_N, IRN\_Ganj\_Dareh\_N(1))*

We note that one of the Test populations, the Neolithic population of the Zagros from Iran(1) cannot be well-modeled with either 1 or 2 of the Sources, consistent with its extreme PCA position in the context of West Eurasian variation. The only population that can be modeled with it as a source is the Bestansur PPN individual from the Zagros foothills in Iraq; however, the low data yield of this individual allows it to be modeled with a variety of sources (Table S 1). Two more Neolithic individuals from Shanidar in the Zagros in Iraq can be modeled as a clade with either of the Neolithic individuals of Armenia, however this should not be over-interpreted given the low data yield for these individuals. Both the Bestansur and Shanidar individuals carry a substantial proportion of CHG ancestry in terms of the main 5-way model of (12). Moreover, 2-way models with Ganj Dareh as one source and an Anatolian or Mesopotamian source as the 2<sup>nd</sup>, show an excess of Ganj Dareh ancestry consistent with the eastern geographical position relative to Anatolia and Mesopotamia. While data quality precludes very precise inferences of ancestral composition, the data from the Zagros in Iraq seems consistent with these populations being transitional from Anatolia and Mesopotamia and the population at Ganj Dareh further south in the Central Zagros mountains.

### *Levant\_PPN(1)*

A single source for the Levantine Neolithic (from Jordan and Israel) can be firmly rejected ( $p < 1e-12$ ), but a total of six 2-way models work well, all of which involve an Anatolian Neolithic or related source and the Epipaleolithic Natufians.(1) Interestingly, the model in which the source for the Levantine Neolithic is Mesopotamian rather than Anatolian is firmly rejected as well ( $p = 5e-6$ ). In a previous publication(1), the Levantine PPN population was modeled in a similar 2-way fashion but there was an open question whether a more intermediate population (such as Mesopotamian) might be contributing to the Levant. Our results prove that this was not the case by rejecting a contribution from Mesopotamian populations of the Tigris region. As we will now see in the modeling of the population of Mesopotamia, this can be explained by the presence of CHG-related ancestry in Mesopotamia.

### *Neolithic North Mesopotamia (Mesopotamia\_PPN; this study)*

The Northern Mesopotamian population includes two individuals from Nemrik9 in Iraq and an individual from Mardin (Boncuklu Tarla) in SE Turkey; the two are co-analyzed given their geographical and temporal proximity and clustering in PCA. A one-way model fits them with Aknashen ( $p = 0.894$ ), Masis Blur ( $p = 0.103$ ), or Azerbaijan Neolithic ( $p = 0.340$ ) as a source (Table S 1). Given that the Mesopotamian samples predate these 6<sup>th</sup> millennium BCE ones, the Mesopotamian samples are unlikely to be derived from those of the South Caucasus, and these models merely point to the overall similarity of North Mesopotamian with South Caucasus populations. To determine the origins of the Mesopotamian PPN population we also examined 2-way models (Table S 2) and find that a model in which Mesopotamian samples are a mix of Anatolian PPN Neolithic (Aşıklı Höyük) and Ganj Dareh ( $p = 0.16$ ) and also as a mix of Cyprus PPN and Ganj Dareh ( $p = 0.194$ ); we remarked above on the similarity between the Cyprus PPN and the Central Anatolian PPN, so it makes sense that its population can also be used as a genetic source stand-in although this scenario is less plausible geographically. North Mesopotamia is geographically intermediate between Anatolia and Iran, so this model is more plausible, although by no means definite, given the uncertainty about the genetic composition of PPN populations elsewhere in the ancient Near East between Central Anatolia and the Zagros.

We note that an Anatolian Neolithic+CHG model fails ( $p < 1e-9$ ) as does a Levantine+Ganj Dareh one ( $p < 1e-9$ ), as does a Barcın Anatolian Neolithic+Ganj Dareh one ( $p = 0.002$ ), as does a Levantine Neolithic+CHG one ( $p = 0.008$ ) thus excluding these other possible pairwise combinations for which Mesopotamia is geographically intermediate.

The LBA individual from Nemrik9 fits as a clade with the Mesopotamian PPN ( $p = 0.27$ ) and with Azerbaijan Neolithic ( $p = 0.25$ ) and with Masis Blur ( $p = 0.026$ ) providing some evidence for long-term continuity of the population of Mesopotamia and its environs, a pattern that must be verified with more individuals at both ends of the time span between the PPN period and the Late Bronze Age. Given that it is of higher data quality than the other samples from Mesopotamia we group it with them in a Mesopotamian meta-population which we use in our analyses of the rest of the paper.

### *Neolithic Anatolia (TUR\_Marmara\_Barcın\_N(2), TUR\_C\_Boncuklu\_PPN\_Feldman(6), TUR\_C\_AşıklıHöyük\_PPN(8), TUR\_C\_Çatalhöyük\_N(8))*

Finally, we turn to Neolithic Central/Western Anatolia; we remarked above on the similarity between it and the PPN population of Cyprus, and this is the only population that can be used as

a source for the Neolithic NW Anatolia; however, it would seem unlikely that the Neolithic population of the geographically large region of Anatolia would be descended from that of the small island to its south, especially since the 2-way models involve the Epipaleolithic sample from Pınarbaşı as one of the two sources, suggesting a rooting of Neolithic Anatolian populations on local (pre-Neolithic) hunter-gatherers of the region. The pottery Neolithic from Çatalhöyük are marginally consistent with forming a clade with the PPN of Aşıklı Höyük ( $p=0.03$ ), but other than that, no pairs of Anatolian Neolithic populations form a clade, suggesting that the PPN and pottery Neolithic groups inhabiting the large Anatolian peninsula did not form a single homogeneous population. Moreover, while Pınarbaşı features prominently in 2-way models for Anatolian Neolithic populations, it does not form a clade with any of them by itself: thus, a general conclusion can be drawn that Anatolian Neolithic populations were descended from local hunter-gatherers but not exclusively so.

For the two PPN populations from Boncuklu and Aşıklı Höyük who both inhabited Central Anatolia during, models of Pınarbaşı + Mesopotamian Neolithic fit with contrasting amounts of Mesopotamian ancestry in the two sites (~26% low at Boncuklu vs. ~70% high at Aşıklı Höyük). The results point to gene flow from the east (represented by Mesopotamia\_PPN) into Anatolia, a conclusion that makes sense given the earlier appearance of agriculture in SE Anatolia and N Mesopotamia and its subsequent spread westward. But, gene flow was potentially bidirectional, as we have seen that Neolithic populations of the South Caucasus can be modeled as admixtures of Anatolian populations with CHG and the Mesopotamian population could be modeled as a mixture of Ganj Dareh + Aşıklı Höyük. Thus, in both locales (Central Anatolia and the South Caucasus) there is persistence of the local hunter-gatherer ancestry (Pınarbaşı and CHG respectively) but with some influence from the other (CHG/Mesopotamian in Anatolia and Anatolian in the South Caucasus). The results on the Anatolian PPN add another cline to the picture: between Anatolia and Mesopotamia in which PPN samples from Boncuklu in Anatolia and Nemrik 9 and Mardin in Mesopotamia occupied opposite ends, with Aşıklı Höyük being intermediate. We cannot speak of persistence of hunter-gatherer ancestry in Mesopotamia itself, as we lack pre-Neolithic individuals; it is possible that the population there was also a Neolithic mixture (as suggested by the 2-way admixture models that fit it), but admixture in this population may also precede the advent of the Neolithic.

For the two pottery Neolithic populations, we observe that the Çatalhöyük population from Central Anatolia can be modeled as mostly (~96%) of Aşıklı Höyük origin (+Pınarbaşı) suggesting continuity with the pre-pottery Neolithic population of the same region. We note, however, that while we were able to model the Aşıklı Höyük population as a mixture of Pınarbaşı and Mesopotamian PPN ( $p=0.25$ ), the same model fails for Çatalhöyük ( $p=0.002$ ); we investigate the cause of this disparity below. As for the other pottery Neolithic population (Barcın from NW Anatolia), we can model it well as a mixture of about half Çatalhöyük and half Pınarbaşı ancestry. Thus, the data are consistent with this population from the NW end of the Anatolian peninsula being derived from pottery Neolithic populations of Central Anatolia (closer to the centers of domestication of the Fertile Crescent) but with absorption of Epipaleolithic hunter-gatherer ancestry.

### A common 3-way model for the Neolithic Near East

To better understand the origin of Neolithic Near Eastern populations, many of which could be modeled as mixtures of each other we considered them in terms of the 3-way model (CHG +



Pınarbaşı + Natufians) that allow us to compare them using a common set of sources representing the earliest (and pre-Neolithic) populations in the South Caucasus, Anatolia, and the Levant. Thus this model describes the studied populations in terms of ancient Near Eastern populations predating the emergence of agriculture. The results of this model are shown in Table S 3. We summarize them below:

(1) Many of the populations of Table S 3 require ancestry from all 3 sources of the model. Exceptions are the Levantine PPN for which the contribution of the CHG is consistent with zero and the farmers from the Zagros (Bestansur, Shanidar, and Ganj Dareh) for which the contribution of Pınarbaşı is consistent with zero. The PPN farmers from Boncuklu in Central Anatolia have a small and not significantly positive fraction of Natufian ancestry ( $4.8 \pm 6.8\%$ ), and this jumps to  $40.3 \pm 12.1\%$  at Aşıklı Höyük and  $51.3 \pm 5\%$  at Çatalhöyük. Importantly, none of them have ancestry only from a single pre-Neolithic source.

(2) Anatolian Epipaleolithic ancestry (represented by Pınarbaşı) makes up a major source of ancestry of Neolithic farmers from Central/NW Anatolia; Levantine Epipaleolithic ancestry (represented by Natufians) makes up the major source of ancestry of PPN farmers from the Levant; CHG ancestry is represented across the West Asian highlands but diminishes towards the west (in Anatolia) and the South (into the Levant)

(3) The PPN population of Mesopotamia is intermediate in the context of these three Epipaleolithic sources of ancestry and is modeled as deriving its ancestry from all three. Two possibilities are raised: first, that the PPN population was indeed deeply admixed as its geographically intermediate position would suggest, or, second, that there is another unsampled hunter-gatherer population in the Mesopotamian region from which the PPN population is descended. As an analogy, prior to the sampling of Pınarbaşı(6) the Anatolian Neolithic population could be modeled as a 3-way mixture involving Levantine Neolithic, WHG, and CHG sources(1), but now can be modeled with Pınarbaşı as its major source on top of which Mesopotamian Neolithic ancestry was added to various degrees

(4) The PPN population of Cyprus and the Neolithic populations of the South Caucasus (Armenia and Azerbaijan) represent similar mixtures as the PPN population of Mesopotamia but with varying proportions of the three components. Cyprus is similar to Anatolia in its lack of substantial CHG ancestry, but its Pınarbaşı/Natufian balance tilted towards the latter, explaining the results of 2-way modeling above. The South Caucasus is similar to Mesopotamia, but with an excess of Pınarbaşı-related ancestry.

These observations are presented visually in Fig.2.

#### Caucasus hunter-gatherer vs. Iranian Neolithic ancestry

CHG and IRN\_Ganj\_Dareh\_N often appear as interchangeable sources for Neolithic populations and we wanted to determine if we can differentiate between the two. We thus fit the two 3-way models: (CHG or IRN\_Ganj\_Dareh\_N) + Pınarbaşı + Natufians, i.e., setting one of the two populations as a source and including the other in the right set of outgroups (Table S 4).

For many Test populations both models cannot be rejected, and so for them the “Caucasus-Iran” influence does not clearly stem from either the CHG or Neolithic Iran.

For two populations (AZE\_N and Mesopotamia\_PPN) which neighbor both Iran and the South Caucasus *both* models are rejected, suggesting that while these populations clearly have some “Caucasus-Iran”-related ancestry as suggested by the modeling of Table S 2, they cannot be modeled with only one of the two to the exclusion of the other: a possible interpretation is that

these geographically intermediate populations possess ancestry related to both their Caucasus and Iran neighbors.

For the Barcın Neolithic, the CHG model is rejected ( $1.13E-03$ ) while the Iran one narrowly accepted ( $0.0142$ ). This population can be modeled to derive some of its ancestry from the east of NW Anatolia, and thus potentially from both CHG- and Iran-related sources.

Finally, for the South Caucasus Neolithic at Aknashen, the CHG model is not rejected ( $p=0.46$ ) while that with Iran as a source is ( $p=3.23E-04$ ), suggesting that in the South Caucasus the Neolithic population can be modeled with CHG ancestry alone.

### Levantine vs. Mesopotamian influence in Anatolia

Anatolian Neolithic populations cannot be modeled with only ancestry from Pınarbaşı (Epipaleolithic Central Anatolia), but also require Natufian and CHG ancestry (pre-Neolithic sources from the Levant and Caucasus) (Table S 3). In order to identify the proximate source of this ancestry we examined a 3-way model Levant\_PPN+Mesopotamia\_PPN+ Pınarbaşı (Table S 5).

This model reveals that for the PPN populations from Central Anatolia (Boncuklu and Aşıklı Höyük) Mesopotamian PPN ancestry alone can be added to the Pınarbaşı substratum, with the two sites contrasting in their proportions of the two components, with Boncuklu derived more from the substratum and Aşıklı Höyük more from a Mesopotamian source.

By contrast, both pottery Neolithic populations (Barcın and Çatalhöyük) from NW and Central Anatolia are modeled not only with Mesopotamian ancestry but with a statistically significant proportions of ~13-17% Levantine PPN ancestry.

(One of the individuals from Aşıklı Höyük (Ash133.SG) is a PCA outlier, Fig. 2, clustering with Çatalhöyük individuals. Out of caution, we refit the model of Table S 5 excluding this individual and obtained an estimate of  $-1.0\pm 9.8\%$  Levant\_PPN,  $68.1\pm 13.9\%$  Mesopotamia\_PPN, and  $32.9\pm 12.5\%$  CHG ancestry, similar to those of Table S 5.)

An interpretation of these results is that the population of Anatolia experienced an influx from North Mesopotamia during the spread of the Pre-Pottery Neolithic while the later spread of the pottery Neolithic was derived from a slightly different population that was intermediate between the sampled Levantine and Mesopotamian PPN populations. Future sampling of the first pottery Neolithic populations of the Near East may reveal whether these could be a source that could account for the westward spread of the extra Levantine ancestry westward into Anatolia.

| Test                  | P-value | Source                |
|-----------------------|---------|-----------------------|
| ALB_N                 | 0.099   | ARM_Masis_Blur_N      |
| ALB_N                 | 0.939   | CYP_PPNB              |
| ALB_N                 | 0.253   | TUR_C_AşiklIHöyük_PPN |
| ALB_N                 | 0.430   | TUR_C_Çatalhöyük_N    |
| ALB_N                 | 0.167   | TUR_Marmara_Barcın_N  |
| ALB_N                 | 0.015   | TUR_Pınarbaşı_EpiP    |
| ARM_Aknashen_N        | 0.059   | ARM_Masis_Blur_N      |
| ARM_Aknashen_N        | 0.039   | AZE_N                 |
| ARM_Aknashen_N        | 0.894   | Mesopotamia_PPN       |
| ARM_Aknashen_N        | 0.018   | TUR_C_AşiklIHöyük_PPN |
| ARM_Masis_Blur_N      | 0.059   | ARM_Aknashen_N        |
| ARM_Masis_Blur_N      | 0.348   | AZE_N                 |
| ARM_Masis_Blur_N      | 0.103   | Mesopotamia_PPN       |
| ARM_Masis_Blur_N      | 0.563   | TUR_C_AşiklIHöyük_PPN |
| AZE_N                 | 0.039   | ARM_Aknashen_N        |
| AZE_N                 | 0.348   | ARM_Masis_Blur_N      |
| AZE_N                 | 0.340   | Mesopotamia_PPN       |
| CYP_PPNB              | 0.374   | TUR_C_AşiklIHöyük_PPN |
| CYP_PPNB              | 0.048   | TUR_C_Çatalhöyük_N    |
| CYP_PPNB              | 0.119   | TUR_Marmara_Barcın_N  |
| IRQ_Bestansur_PPN     | 0.090   | ARM_Aknashen_N        |
| IRQ_Bestansur_PPN     | 0.477   | ARM_Masis_Blur_N      |
| IRQ_Bestansur_PPN     | 0.085   | AZE_N                 |
| IRQ_Bestansur_PPN     | 0.064   | CHG                   |
| IRQ_Bestansur_PPN     | 0.274   | CYP_PPNB              |
| IRQ_Bestansur_PPN     | 0.092   | IRN_Ganj_Dareh_N      |
| IRQ_Bestansur_PPN     | 0.073   | ISR_Natufian_EpiP     |
| IRQ_Bestansur_PPN     | 0.658   | Mesopotamia_PPN       |
| IRQ_Bestansur_PPN     | 0.105   | TUR_C_AşiklIHöyük_PPN |
| IRQ_Bestansur_PPN     | 0.373   | TUR_C_Çatalhöyük_N    |
| IRQ_Shanidar_N        | 0.239   | ARM_Aknashen_N        |
| IRQ_Shanidar_N        | 0.082   | ARM_Masis_Blur_N      |
| IRQ_Shanidar_N        | 0.257   | Mesopotamia_PPN       |
| IRQ_Shanidar_N        | 0.030   | TUR_C_AşiklIHöyük_PPN |
| Mesopotamia_PPN       | 0.894   | ARM_Aknashen_N        |
| Mesopotamia_PPN       | 0.103   | ARM_Masis_Blur_N      |
| Mesopotamia_PPN       | 0.340   | AZE_N                 |
| Mesopotamia_LBA       | 0.026   | ARM_Masis_Blur_N      |
| Mesopotamia_LBA       | 0.245   | AZE_N                 |
| Mesopotamia_LBA       | 0.269   | Mesopotamia_PPN       |
| TUR_C_AşiklIHöyük_PPN | 0.018   | ARM_Aknashen_N        |
| TUR_C_AşiklIHöyük_PPN | 0.563   | ARM_Masis_Blur_N      |
| TUR_C_AşiklIHöyük_PPN | 0.374   | CYP_PPNB              |
| TUR_C_AşiklIHöyük_PPN | 0.030   | TUR_C_Çatalhöyük_N    |
| TUR_C_Çatalhöyük_N    | 0.048   | CYP_PPNB              |
| TUR_C_Çatalhöyük_N    | 0.030   | TUR_C_AşiklIHöyük_PPN |
| TUR_Marmara_Barcın_N  | 0.119   | CYP_PPNB              |

**Table S 1 Test populations that fit as simple clades of Source populations**

| Test                  | P-value      | A                     | B                           | Mixture proportions |              | Standard Errors |              |
|-----------------------|--------------|-----------------------|-----------------------------|---------------------|--------------|-----------------|--------------|
|                       |              |                       |                             | A                   | B            | Test            | P-value      |
| ALB N                 | 0.898        | ARM Aknashen N        | CYP PPNB                    | 0.031               | 0.969        | 0.098           | 0.098        |
| ALB N                 | 0.314        | ARM Aknashen N        | TUR C Boncuklu PPN          | 0.475               | 0.525        | 0.112           | 0.112        |
| ALB N                 | 0.728        | ARM Aknashen N        | TUR Marmara Barcin N        | 0.372               | 0.628        | 0.121           | 0.121        |
| ALB N                 | 0.514        | ARM Aknashen N        | TUR Pınarbaşı EpiP          | 0.543               | 0.457        | 0.107           | 0.107        |
| ALB N                 | 0.894        | ARM Masis Blur N      | CYP PPNB                    | 0.063               | 0.937        | 0.241           | 0.241        |
| ALB N                 | 0.037        | ARM Masis Blur N      | EHG                         | 0.998               | 0.002        | 0.032           | 0.032        |
| ALB N                 | 0.063        | ARM Masis Blur N      | ISR Natufian EpiP           | 0.901               | 0.099        | 0.294           | 0.294        |
| ALB N                 | 0.095        | ARM Masis Blur N      | Levant PPN                  | 0.910               | 0.090        | 0.085           | 0.085        |
| ALB N                 | 0.043        | ARM Masis Blur N      | MAR Taforalt EpiP           | 0.988               | 0.012        | 0.025           | 0.025        |
| ALB N                 | 0.070        | ARM Masis Blur N      | SRB Iron Gates HG           | 0.989               | 0.011        | 0.019           | 0.019        |
| ALB N                 | 0.306        | ARM Masis Blur N      | TUR C AşikliHöyük PPN       | 0.459               | 0.541        | 0.718           | 0.718        |
| ALB N                 | 0.560        | ARM Masis Blur N      | TUR C Boncuklu PPN          | 0.645               | 0.355        | 0.136           | 0.136        |
| ALB N                 | 0.677        | ARM Masis Blur N      | TUR Marmara Barcin N        | 0.519               | 0.481        | 0.174           | 0.174        |
| ALB N                 | 0.629        | ARM Masis Blur N      | TUR Pınarbaşı EpiP          | 0.716               | 0.284        | 0.121           | 0.121        |
| ALB N                 | 0.069        | ARM Masis Blur N      | WHG                         | 0.980               | 0.020        | 0.016           | 0.016        |
| ALB N                 | 0.893        | AZE N                 | CYP PPNB                    | 0.009               | 0.991        | 0.066           | 0.066        |
| ALB N                 | 0.608        | AZE N                 | TUR C Boncuklu PPN          | 0.362               | 0.638        | 0.091           | 0.091        |
| ALB N                 | 0.341        | AZE N                 | TUR C Catalhöyük N          | 0.054               | 0.946        | 0.130           | 0.130        |
| ALB N                 | 0.795        | AZE N                 | TUR Marmara Barcin N        | 0.264               | 0.736        | 0.096           | 0.096        |
| ALB N                 | 0.520        | AZE N                 | TUR Pınarbaşı EpiP          | 0.454               | 0.546        | 0.111           | 0.111        |
| ALB N                 | 0.397        | CHG                   | TUR C AşikliHöyük PPN       | 0.063               | 0.937        | 0.038           | 0.038        |
| ALB N                 | 0.158        | CHG                   | TUR C Boncuklu PPN          | 0.236               | 0.764        | 0.072           | 0.072        |
| ALB N                 | 0.994        | CHG                   | TUR C Catalhöyük N          | 0.114               | 0.886        | 0.065           | 0.065        |
| ALB N                 | 0.760        | CHG                   | TUR Marmara Barcin N        | 0.189               | 0.811        | 0.068           | 0.068        |
| ALB N                 | 0.033        | CHG                   | TUR Pınarbaşı EpiP          | 0.217               | 0.783        | 0.139           | 0.139        |
| ALB N                 | 0.914        | CYP PPNB              | ISR Natufian EpiP           | 0.919               | 0.081        | 0.108           | 0.108        |
| ALB N                 | 0.966        | CYP PPNB              | Levant PPN                  | 0.949               | 0.051        | 0.050           | 0.050        |
| ALB N                 | 0.895        | CYP PPNB              | Mesopotamia PPN             | 0.983               | 0.017        | 0.080           | 0.080        |
| ALB N                 | 0.900        | CYP PPNB              | MAR Taforalt EpiP           | 0.998               | 0.002        | 0.016           | 0.016        |
| ALB N                 | 0.950        | CYP PPNB              | TUR C AşikliHöyük PPN       | 0.696               | 0.304        | 0.262           | 0.262        |
| ALB N                 | 0.916        | CYP PPNB              | TUR C Catalhöyük N          | 0.857               | 0.143        | 0.291           | 0.291        |
| ALB N                 | 0.892        | CYP PPNB              | TUR Marmara Barcin N        | 0.990               | 0.010        | 0.180           | 0.180        |
| ALB N                 | 0.614        | EHG                   | TUR C AşikliHöyük PPN       | 0.025               | 0.975        | 0.017           | 0.017        |
| ALB N                 | 0.413        | EHG                   | TUR C Catalhöyük N          | 0.038               | 0.962        | 0.032           | 0.032        |
| ALB N                 | 0.208        | IRN Ganj Dareh N      | TUR C AşikliHöyük PPN       | 0.010               | 0.990        | 0.024           | 0.024        |
| ALB N                 | 0.309        | IRN Ganj Dareh N      | TUR C Boncuklu PPN          | 0.182               | 0.818        | 0.051           | 0.051        |
| ALB N                 | 0.356        | IRN Ganj Dareh N      | TUR C Catalhöyük N          | 0.029               | 0.971        | 0.050           | 0.050        |
| ALB N                 | 0.879        | IRN Ganj Dareh N      | TUR Marmara Barcin N        | 0.144               | 0.856        | 0.049           | 0.049        |
| ALB N                 | 0.095        | IRN Ganj Dareh N      | TUR Pınarbaşı EpiP          | 0.202               | 0.798        | 0.074           | 0.074        |
| ALB N                 | 0.134        | ISR Natufian EpiP     | TUR C Boncuklu PPN          | 0.471               | 0.529        | 0.129           | 0.129        |
| ALB N                 | 0.353        | ISR Natufian EpiP     | TUR C Catalhöyük N          | 0.204               | 0.796        | 0.159           | 0.159        |
| ALB N                 | 0.086        | ISR Natufian EpiP     | TUR Marmara Barcin N        | 0.170               | 0.830        | 0.248           | 0.248        |
| ALB N                 | 0.034        | ISR Natufian EpiP     | TUR Pınarbaşı EpiP          | 0.428               | 0.572        | 0.186           | 0.186        |
| ALB N                 | 0.160        | Levant PPN            | TUR C Boncuklu PPN          | 0.261               | 0.739        | 0.081           | 0.081        |
| ALB N                 | 0.442        | Levant PPN            | TUR C Catalhöyük N          | 0.088               | 0.912        | 0.078           | 0.078        |
| ALB N                 | 0.168        | Levant PPN            | TUR Marmara Barcin N        | 0.098               | 0.902        | 0.090           | 0.090        |
| ALB N                 | 0.071        | Levant PPN            | TUR Pınarbaşı EpiP          | 0.244               | 0.756        | 0.095           | 0.095        |
| ALB N                 | 0.478        | Mesopotamia PPN       | TUR C Boncuklu PPN          | 0.429               | 0.571        | 0.101           | 0.101        |
| ALB N                 | 0.710        | Mesopotamia PPN       | TUR Marmara Barcin N        | 0.318               | 0.682        | 0.114           | 0.114        |
| ALB N                 | 0.479        | Mesopotamia PPN       | TUR Pınarbaşı EpiP          | 0.502               | 0.498        | 0.113           | 0.113        |
| ALB N                 | 0.357        | MAR Taforalt EpiP     | TUR C AşikliHöyük PPN       | 0.006               | 0.994        | 0.013           | 0.013        |
| ALB N                 | 0.106        | MAR Taforalt EpiP     | TUR C Boncuklu PPN          | 0.093               | 0.907        | 0.031           | 0.031        |
| ALB N                 | 0.661        | MAR Taforalt EpiP     | TUR C Catalhöyük N          | 0.045               | 0.955        | 0.023           | 0.023        |
| ALB N                 | 0.372        | MAR Taforalt EpiP     | TUR Marmara Barcin N        | 0.063               | 0.937        | 0.029           | 0.029        |
| ALB N                 | 0.018        | MAR Taforalt EpiP     | TUR Pınarbaşı EpiP          | 0.049               | 0.951        | 0.042           | 0.042        |
| ALB N                 | 0.690        | RUS AfontovaGora3     | TUR C AşikliHöyük PPN       | 0.091               | 0.909        | 0.037           | 0.037        |
| ALB N                 | 0.018        | RUS AfontovaGora3     | TUR C Boncuklu PPN          | 0.164               | 0.836        | 0.087           | 0.087        |
| ALB N                 | 0.512        | RUS AfontovaGora3     | TUR C Catalhöyük N          | 0.121               | 0.879        | 0.070           | 0.070        |
| ALB N                 | 0.379        | RUS AfontovaGora3     | TUR Marmara Barcin N        | 0.174               | 0.826        | 0.070           | 0.070        |
| ALB N                 | 0.491        | RUS MA1 HG            | TUR C AşikliHöyük PPN       | 0.039               | 0.961        | 0.021           | 0.021        |
| ALB N                 | 0.018        | RUS MA1 HG            | TUR C Boncuklu PPN          | 0.083               | 0.917        | 0.044           | 0.044        |
| ALB N                 | 0.705        | RUS MA1 HG            | TUR C Catalhöyük N          | 0.070               | 0.930        | 0.036           | 0.036        |
| ALB N                 | 0.305        | RUS MA1 HG            | TUR Marmara Barcin N        | 0.076               | 0.924        | 0.041           | 0.041        |
| ALB N                 | 0.281        | SRB Iron Gates HG     | TUR C AşikliHöyük PPN       | 0.006               | 0.994        | 0.009           | 0.009        |
| ALB N                 | 0.383        | SRB Iron Gates HG     | TUR C Catalhöyük N          | 0.025               | 0.975        | 0.019           | 0.019        |
| ALB N                 | 0.204        | TUR C AşikliHöyük PPN | TUR C Boncuklu PPN          | 0.949               | 0.051        | 0.175           | 0.175        |
| ALB N                 | 0.311        | TUR C AşikliHöyük PPN | TUR Marmara Barcin N        | 0.803               | 0.197        | 1.208           | 1.208        |
| ALB N                 | 0.241        | TUR C AşikliHöyük PPN | TUR Pınarbaşı EpiP          | 0.932               | 0.068        | 0.114           | 0.114        |
| ALB N                 | 0.414        | TUR C AşikliHöyük PPN | WHG                         | 0.986               | 0.014        | 0.009           | 0.009        |
| ALB N                 | 0.332        | TUR C Boncuklu PPN    | TUR C Catalhöyük N          | 0.093               | 0.907        | 0.299           | 0.299        |
| ALB N                 | 0.378        | TUR C Catalhöyük N    | TUR Marmara Barcin N        | 0.621               | 0.379        | 0.485           | 0.485        |
| ALB N                 | 0.601        | TUR C Catalhöyük N    | TUR Pınarbaşı EpiP          | 0.785               | 0.215        | 0.157           | 0.157        |
| ALB N                 | 0.325        | TUR C Catalhöyük N    | WHG                         | 0.985               | 0.015        | 0.017           | 0.017        |
| ARM Aknashen N        | 0.207        | ARM Masis Blur N      | CHG                         | 0.827               | 0.173        | 0.165           | 0.165        |
| ARM Aknashen N        | 0.067        | ARM Masis Blur N      | IRN Ganj Dareh N            | 0.904               | 0.096        | 0.069           | 0.069        |
| ARM Aknashen N        | 0.048        | ARM Masis Blur N      | RUS MA1 HG                  | 0.970               | 0.030        | 0.031           | 0.031        |
| ARM Aknashen N        | 0.619        | AZE N                 | CHG                         | 0.780               | 0.220        | 0.150           | 0.150        |
| ARM Aknashen N        | 0.184        | AZE N                 | CYP PPNB                    | 0.808               | 0.192        | 1.856           | 1.856        |
| ARM Aknashen N        | 0.013        | AZE N                 | EHG                         | 1.000               | 0.000        | 0.029           | 0.029        |
| ARM Aknashen N        | 0.083        | AZE N                 | IRN Ganj Dareh N            | 0.839               | 0.161        | 0.082           | 0.082        |
| ARM Aknashen N        | 0.031        | AZE N                 | RUS MA1 HG                  | 0.967               | 0.033        | 0.038           | 0.038        |
| ARM Aknashen N        | 0.459        | CHG                   | CYP PPNB                    | 0.393               | 0.607        | 0.116           | 0.116        |
| <b>ARM Aknashen N</b> | <b>0.065</b> | <b>CHG</b>            | <b>Levant PPN</b>           | <b>0.729</b>        | <b>0.271</b> | <b>0.057</b>    | <b>0.057</b> |
| ARM Aknashen N        | 0.878        | CHG                   | TUR C AşikliHöyük PPN       | 0.229               | 0.771        | 0.072           | 0.072        |
| ARM Aknashen N        | 0.225        | CHG                   | TUR C Boncuklu PPN          | 0.700               | 0.300        | 0.057           | 0.057        |
| ARM Aknashen N        | 0.973        | CHG                   | TUR C Catalhöyük N          | 0.438               | 0.562        | 0.075           | 0.075        |
| <b>ARM Aknashen N</b> | <b>0.704</b> | <b>CHG</b>            | <b>TUR Marmara Barcin N</b> | <b>0.659</b>        | <b>0.341</b> | <b>0.059</b>    | <b>0.059</b> |
| ARM Aknashen N        | 0.218        | CHG                   | TUR Pınarbaşı EpiP          | 0.675               | 0.325        | 0.085           | 0.085        |
| ARM Aknashen N        | 0.017        | CYP PPNB              | IRN Ganj Dareh N            | 0.773               | 0.227        | 0.053           | 0.053        |
| ARM Aknashen N        | 0.831        | CYP PPNB              | Mesopotamia PPN             | 0.038               | 0.962        | 0.233           | 0.233        |

|                         |              |                       |                             |              |              |              |              |
|-------------------------|--------------|-----------------------|-----------------------------|--------------|--------------|--------------|--------------|
| ARM Aknashen N          | 0.740        | EHG                   | Mesopotamia PPN             | 0.003        | 0.997        | 0.025        | 0.025        |
| ARM Aknashen N          | 0.757        | IRN Ganj Dareh N      | TUR C AşikliHöyük PPN       | 0.134        | 0.866        | 0.037        | 0.037        |
| ARM Aknashen N          | 0.038        | IRN Ganj Dareh N      | TUR C Çatalhöyük N          | 0.327        | 0.673        | 0.051        | 0.051        |
| ARM Aknashen N          | 0.881        | Mesopotamia PPN       | TUR C AşikliHöyük PPN       | 0.596        | 0.404        | 0.353        | 0.353        |
| ARM Aknashen N          | 0.840        | Mesopotamia PPN       | TUR C Boncuklu PPN          | 0.979        | 0.021        | 0.056        | 0.056        |
| ARM Aknashen N          | 0.829        | Mesopotamia PPN       | TUR C Çatalhöyük N          | 0.980        | 0.020        | 0.161        | 0.161        |
| ARM Aknashen N          | 0.830        | Mesopotamia PPN       | TUR Marmara Barcin N        | 0.990        | 0.010        | 0.060        | 0.060        |
| ARM Aknashen N          | 0.010        | MAR Taforalt EpiP     | TUR C AşikliHöyük PPN       | 0.011        | 0.989        | 0.011        | 0.011        |
| ARM Aknashen N          | 0.011        | RUS AfontovaGora3     | TUR C AşikliHöyük PPN       | 0.014        | 0.986        | 0.029        | 0.029        |
| ARM Aknashen N          | 0.019        | RUS MA1 HG            | TUR C AşikliHöyük PPN       | 0.017        | 0.983        | 0.018        | 0.018        |
| ARM Masis Blur N        | 0.263        | ARM Aknashen N        | AZE N                       | 0.217        | 0.783        | 0.564        | 0.564        |
| ARM Masis Blur N        | 0.076        | ARM Aknashen N        | CYP PPNB                    | 0.684        | 0.316        | 0.210        | 0.210        |
| ARM Masis Blur N        | 0.021        | ARM Aknashen N        | EHG                         | 0.998        | 0.002        | 0.024        | 0.024        |
| ARM Masis Blur N        | 0.316        | ARM Aknashen N        | ISR Natufian EpiP           | 0.762        | 0.238        | 0.081        | 0.081        |
| <b>ARM Masis Blur N</b> | <b>0.328</b> | <b>ARM Aknashen N</b> | <b>Levant PPN</b>           | <b>0.864</b> | <b>0.136</b> | <b>0.051</b> | <b>0.051</b> |
| ARM Masis Blur N        | 0.102        | ARM Aknashen N        | Mesopotamia PPN             | 0.085        | 0.915        | 0.674        | 0.674        |
| ARM Masis Blur N        | 0.071        | ARM Aknashen N        | MAR Taforalt EpiP           | 0.970        | 0.030        | 0.019        | 0.019        |
| ARM Masis Blur N        | 0.035        | ARM Aknashen N        | SRB Iron Gates HG           | 0.987        | 0.013        | 0.014        | 0.014        |
| ARM Masis Blur N        | 0.485        | ARM Aknashen N        | TUR C AşikliHöyük PPN       | 0.078        | 0.922        | 0.256        | 0.256        |
| ARM Masis Blur N        | 0.068        | ARM Aknashen N        | TUR C Boncuklu PPN          | 0.906        | 0.094        | 0.072        | 0.072        |
| ARM Masis Blur N        | 0.093        | ARM Aknashen N        | TUR C Çatalhöyük N          | 0.642        | 0.358        | 0.333        | 0.333        |
| ARM Masis Blur N        | 0.168        | ARM Aknashen N        | TUR Marmara Barcin N        | 0.825        | 0.175        | 0.083        | 0.083        |
| ARM Masis Blur N        | 0.168        | ARM Aknashen N        | TUR Pınarbaşı EpiP          | 0.844        | 0.156        | 0.068        | 0.068        |
| ARM Masis Blur N        | 0.037        | ARM Aknashen N        | WHG                         | 0.983        | 0.017        | 0.013        | 0.013        |
| ARM Masis Blur N        | 0.314        | AZE N                 | CYP PPNB                    | 0.827        | 0.173        | 0.234        | 0.234        |
| ARM Masis Blur N        | 0.185        | AZE N                 | EHG                         | 0.992        | 0.008        | 0.030        | 0.030        |
| ARM Masis Blur N        | 0.228        | AZE N                 | ISR Natufian EpiP           | 0.867        | 0.133        | 0.152        | 0.152        |
| ARM Masis Blur N        | 0.343        | AZE N                 | Levant PPN                  | 0.921        | 0.079        | 0.075        | 0.075        |
| ARM Masis Blur N        | 0.394        | AZE N                 | SRB Iron Gates HG           | 0.968        | 0.032        | 0.020        | 0.020        |
| ARM Masis Blur N        | 0.718        | AZE N                 | TUR C AşikliHöyük PPN       | 0.069        | 0.931        | 0.243        | 0.243        |
| ARM Masis Blur N        | 0.943        | AZE N                 | TUR C Boncuklu PPN          | 0.802        | 0.198        | 0.073        | 0.073        |
| ARM Masis Blur N        | 0.684        | AZE N                 | TUR C Çatalhöyük N          | 0.594        | 0.406        | 0.185        | 0.185        |
| ARM Masis Blur N        | 0.930        | AZE N                 | TUR Marmara Barcin N        | 0.763        | 0.237        | 0.087        | 0.087        |
| ARM Masis Blur N        | 0.881        | AZE N                 | TUR Pınarbaşı EpiP          | 0.842        | 0.158        | 0.085        | 0.085        |
| ARM Masis Blur N        | 0.403        | AZE N                 | WHG                         | 0.985        | 0.015        | 0.017        | 0.017        |
| ARM Masis Blur N        | 0.018        | CHG                   | CYP PPNB                    | 0.219        | 0.781        | 0.058        | 0.058        |
| ARM Masis Blur N        | 0.600        | CHG                   | TUR C AşikliHöyük PPN       | 0.041        | 0.959        | 0.044        | 0.044        |
| ARM Masis Blur N        | 0.028        | CHG                   | TUR C Boncuklu PPN          | 0.489        | 0.511        | 0.054        | 0.054        |
| ARM Masis Blur N        | 0.360        | CHG                   | TUR C Çatalhöyük N          | 0.203        | 0.797        | 0.063        | 0.063        |
| <b>ARM Masis Blur N</b> | <b>0.625</b> | <b>CHG</b>            | <b>TUR Marmara Barcin N</b> | <b>0.420</b> | <b>0.580</b> | <b>0.054</b> | <b>0.054</b> |
| ARM Masis Blur N        | 0.019        | CHG                   | TUR Pınarbaşı EpiP          | 0.478        | 0.522        | 0.078        | 0.078        |
| ARM Masis Blur N        | 0.159        | CYP PPNB              | Mesopotamia PPN             | 0.318        | 0.682        | 0.206        | 0.206        |
| ARM Masis Blur N        | 0.060        | EHG                   | Mesopotamia PPN             | 0.029        | 0.971        | 0.028        | 0.028        |
| ARM Masis Blur N        | 0.683        | IRN Ganj Dareh N      | TUR C AşikliHöyük PPN       | 0.037        | 0.963        | 0.028        | 0.028        |
| ARM Masis Blur N        | 0.075        | IRN Ganj Dareh N      | TUR C Boncuklu PPN          | 0.411        | 0.589        | 0.040        | 0.040        |
| ARM Masis Blur N        | 0.083        | IRN Ganj Dareh N      | TUR C Çatalhöyük N          | 0.132        | 0.868        | 0.047        | 0.047        |
| ARM Masis Blur N        | 0.482        | IRN Ganj Dareh N      | TUR Marmara Barcin N        | 0.362        | 0.638        | 0.041        | 0.041        |
| ARM Masis Blur N        | 0.062        | IRN Ganj Dareh N      | TUR Pınarbaşı EpiP          | 0.423        | 0.577        | 0.048        | 0.048        |
| ARM Masis Blur N        | 0.055        | ISR Natufian EpiP     | Mesopotamia PPN             | 0.033        | 0.967        | 0.151        | 0.151        |
| ARM Masis Blur N        | 0.073        | Levant PPN            | Mesopotamia PPN             | 0.041        | 0.959        | 0.068        | 0.068        |
| ARM Masis Blur N        | 0.109        | Mesopotamia PPN       | SRB Iron Gates HG           | 0.973        | 0.027        | 0.016        | 0.016        |
| ARM Masis Blur N        | 0.815        | Mesopotamia PPN       | TUR C AşikliHöyük PPN       | 0.193        | 0.807        | 0.145        | 0.145        |
| ARM Masis Blur N        | 0.982        | Mesopotamia PPN       | TUR C Boncuklu PPN          | 0.779        | 0.221        | 0.061        | 0.061        |
| ARM Masis Blur N        | 0.478        | Mesopotamia PPN       | TUR C Çatalhöyük N          | 0.567        | 0.433        | 0.170        | 0.170        |
| ARM Masis Blur N        | 0.916        | Mesopotamia PPN       | TUR Marmara Barcin N        | 0.742        | 0.258        | 0.074        | 0.074        |
| ARM Masis Blur N        | 0.924        | Mesopotamia PPN       | TUR Pınarbaşı EpiP          | 0.819        | 0.181        | 0.073        | 0.073        |
| ARM Masis Blur N        | 0.105        | Mesopotamia PPN       | WHG                         | 0.978        | 0.022        | 0.016        | 0.016        |
| ARM Masis Blur N        | 0.429        | MAR Taforalt EpiP     | TUR C AşikliHöyük PPN       | 0.005        | 0.995        | 0.010        | 0.010        |
| ARM Masis Blur N        | 0.041        | RUS AfontovaGora3     | TUR C Çatalhöyük N          | 0.110        | 0.890        | 0.043        | 0.043        |
| ARM Masis Blur N        | 0.442        | SRB Iron Gates HG     | TUR C AşikliHöyük PPN       | 0.001        | 0.999        | 0.008        | 0.008        |
| <b>AZE N</b>            | <b>0.598</b> | <b>ARM Aknashen N</b> | <b>ARM Masis Blur N</b>     | <b>0.355</b> | <b>0.645</b> | <b>0.199</b> | <b>0.199</b> |
| AZE N                   | 0.287        | ARM Aknashen N        | CYP PPNB                    | 0.707        | 0.293        | 0.090        | 0.090        |
| AZE N                   | 0.014        | ARM Aknashen N        | EHG                         | 0.992        | 0.008        | 0.019        | 0.019        |
| AZE N                   | 0.322        | ARM Aknashen N        | ISR Natufian EpiP           | 0.848        | 0.152        | 0.050        | 0.050        |
| AZE N                   | 0.401        | ARM Aknashen N        | Levant PPN                  | 0.891        | 0.109        | 0.035        | 0.035        |
| AZE N                   | 0.102        | ARM Aknashen N        | MAR Taforalt EpiP           | 0.965        | 0.035        | 0.015        | 0.015        |
| AZE N                   | 0.052        | ARM Aknashen N        | RUS AfontovaGora3           | 0.997        | 0.003        | 0.028        | 0.028        |
| AZE N                   | 0.023        | ARM Aknashen N        | SRB Iron Gates HG           | 0.988        | 0.012        | 0.010        | 0.010        |
| AZE N                   | 0.054        | ARM Aknashen N        | TUR C AşikliHöyük PPN       | 0.611        | 0.389        | 0.258        | 0.258        |
| AZE N                   | 0.085        | ARM Aknashen N        | TUR C Boncuklu PPN          | 0.921        | 0.079        | 0.040        | 0.040        |
| AZE N                   | 0.210        | ARM Aknashen N        | TUR C Çatalhöyük N          | 0.768        | 0.232        | 0.082        | 0.082        |
| AZE N                   | 0.190        | ARM Aknashen N        | TUR Marmara Barcin N        | 0.883        | 0.117        | 0.044        | 0.044        |
| AZE N                   | 0.151        | ARM Aknashen N        | TUR Pınarbaşı EpiP          | 0.888        | 0.112        | 0.041        | 0.041        |
| AZE N                   | 0.026        | ARM Aknashen N        | WHG                         | 0.986        | 0.014        | 0.010        | 0.010        |
| AZE N                   | 0.613        | ARM Masis Blur N      | CHG                         | 0.895        | 0.105        | 0.061        | 0.061        |
| AZE N                   | 0.957        | ARM Masis Blur N      | IRN Ganj Dareh N            | 0.885        | 0.115        | 0.040        | 0.040        |
| AZE N                   | 0.985        | ARM Masis Blur N      | Mesopotamia PPN             | 0.522        | 0.478        | 0.151        | 0.151        |
| AZE N                   | 0.210        | ARM Masis Blur N      | MAR Taforalt EpiP           | 0.989        | 0.011        | 0.014        | 0.014        |
| AZE N                   | 0.198        | ARM Masis Blur N      | RUS AfontovaGora3           | 0.989        | 0.011        | 0.026        | 0.026        |
| AZE N                   | 0.266        | ARM Masis Blur N      | RUS MA1 HG                  | 0.993        | 0.007        | 0.020        | 0.020        |
| AZE N                   | 0.010        | CHG                   | CYP PPNB                    | 0.282        | 0.718        | 0.054        | 0.054        |
| AZE N                   | 0.010        | CHG                   | TUR C AşikliHöyük PPN       | 0.159        | 0.841        | 0.043        | 0.043        |
| AZE N                   | 0.272        | CHG                   | TUR C Çatalhöyük N          | 0.333        | 0.667        | 0.041        | 0.041        |
| AZE N                   | 0.740        | CYP PPNB              | Mesopotamia PPN             | 0.231        | 0.769        | 0.096        | 0.096        |
| AZE N                   | 0.287        | EHG                   | Mesopotamia PPN             | 0.013        | 0.987        | 0.018        | 0.018        |
| AZE N                   | 0.091        | IRN Ganj Dareh N      | TUR C AşikliHöyük PPN       | 0.134        | 0.866        | 0.028        | 0.028        |
| AZE N                   | 0.024        | IRN Ganj Dareh N      | TUR C Çatalhöyük N          | 0.289        | 0.711        | 0.030        | 0.030        |
| AZE N                   | 0.223        | ISR Natufian EpiP     | Mesopotamia PPN             | 0.047        | 0.953        | 0.063        | 0.063        |
| AZE N                   | 0.431        | Levant PPN            | Mesopotamia PPN             | 0.057        | 0.943        | 0.039        | 0.039        |
| AZE N                   | 0.264        | Mesopotamia PPN       | RUS AfontovaGora3           | 0.973        | 0.027        | 0.029        | 0.029        |
| AZE N                   | 0.270        | Mesopotamia PPN       | RUS MA1 HG                  | 0.989        | 0.011        | 0.021        | 0.021        |
| AZE N                   | 0.410        | Mesopotamia PPN       | SRB Iron Gates HG           | 0.981        | 0.019        | 0.011        | 0.011        |

|                          |              |                         |                              |              |              |              |              |
|--------------------------|--------------|-------------------------|------------------------------|--------------|--------------|--------------|--------------|
| AZE N                    | 0.728        | Mesopotamia PPN         | TUR C AşikliHöyük PPN        | 0.617        | 0.383        | 0.144        | 0.144        |
| AZE N                    | 0.884        | Mesopotamia PPN         | TUR C Boncuklu PPN           | 0.901        | 0.099        | 0.039        | 0.039        |
| AZE N                    | 0.778        | Mesopotamia PPN         | TUR C Çatalhöyük N           | 0.785        | 0.215        | 0.087        | 0.087        |
| AZE N                    | 0.937        | Mesopotamia PPN         | TUR Marmara Barcın N         | 0.877        | 0.123        | 0.045        | 0.045        |
| AZE N                    | 0.823        | Mesopotamia PPN         | TUR Pınarbaşı EpiP           | 0.899        | 0.101        | 0.045        | 0.045        |
| AZE N                    | 0.317        | Mesopotamia PPN         | WHG                          | 0.988        | 0.012        | 0.010        | 0.010        |
| CYP PPNB                 | 0.353        | ARM Masis Blur N        | Mesopotamia PPN              | 0.284        | 0.716        | 4.460        | 4.460        |
| CYP PPNB                 | 0.303        | AZE N                   | TUR C AşikliHöyük PPN        | 0.005        | 0.995        | 0.048        | 0.048        |
| CYP PPNB                 | 0.022        | AZE N                   | TUR Pınarbaşı EpiP           | 0.358        | 0.642        | 0.119        | 0.119        |
| CYP PPNB                 | 0.375        | CHG                     | TUR C AşikliHöyük PPN        | 0.008        | 0.992        | 0.030        | 0.030        |
| CYP PPNB                 | 0.302        | EHG                     | TUR C AşikliHöyük PPN        | 0.012        | 0.988        | 0.016        | 0.016        |
| CYP PPNB                 | 0.044        | EHG                     | TUR C Çatalhöyük N           | 0.046        | 0.954        | 0.029        | 0.029        |
| CYP PPNB                 | 0.601        | ISR Natufian EpiP       | TUR C AşikliHöyük PPN        | 0.098        | 0.902        | 0.059        | 0.059        |
| CYP PPNB                 | 0.305        | ISR Natufian EpiP       | TUR C Boncuklu PPN           | 0.388        | 0.612        | 0.081        | 0.081        |
| CYP PPNB                 | 0.778        | ISR Natufian EpiP       | TUR Marmara Barcın N         | 0.144        | 0.856        | 0.124        | 0.124        |
| CYP PPNB                 | 0.157        | ISR Natufian EpiP       | TUR Pınarbaşı EpiP           | 0.418        | 0.582        | 0.093        | 0.093        |
| <b>CYP PPNB</b>          | <b>0.550</b> | <b>Levant PPN</b>       | <b>TUR C AşikliHöyük PPN</b> | <b>0.068</b> | <b>0.932</b> | <b>0.042</b> | <b>0.042</b> |
| CYP PPNB                 | 0.112        | Levant PPN              | TUR C Boncuklu PPN           | 0.350        | 0.650        | 0.074        | 0.074        |
| CYP PPNB                 | 0.213        | Levant PPN              | TUR Marmara Barcın N         | 0.160        | 0.840        | 0.091        | 0.091        |
| CYP PPNB                 | 0.096        | Levant PPN              | TUR Pınarbaşı EpiP           | 0.346        | 0.654        | 0.088        | 0.088        |
| CYP PPNB                 | 0.027        | Mesopotamia PPN         | TUR Pınarbaşı EpiP           | 0.482        | 0.518        | 0.148        | 0.148        |
| CYP PPNB                 | 0.443        | MAR Taforalt EpiP       | TUR C AşikliHöyük PPN        | 0.014        | 0.986        | 0.012        | 0.012        |
| CYP PPNB                 | 0.080        | MAR Taforalt EpiP       | TUR Marmara Barcın N         | 0.028        | 0.972        | 0.024        | 0.024        |
| CYP PPNB                 | 0.018        | MAR Taforalt EpiP       | TUR Pınarbaşı EpiP           | 0.094        | 0.906        | 0.031        | 0.031        |
| CYP PPNB                 | 0.306        | RUS MA1 HG              | TUR C AşikliHöyük PPN        | 0.003        | 0.997        | 0.018        | 0.018        |
| CYP PPNB                 | 0.358        | SRB Iron Gates HG       | TUR C Çatalhöyük N           | 0.023        | 0.977        | 0.017        | 0.017        |
| CYP PPNB                 | 0.335        | TUR C AşikliHöyük PPN   | TUR C Çatalhöyük N           | 0.708        | 0.292        | 0.524        | 0.524        |
| CYP PPNB                 | 0.326        | TUR C AşikliHöyük PPN   | WHG                          | 0.992        | 0.008        | 0.009        | 0.009        |
| CYP PPNB                 | 0.118        | TUR C Boncuklu PPN      | TUR C Çatalhöyük N           | 0.268        | 0.732        | 0.150        | 0.150        |
| CYP PPNB                 | 0.149        | TUR C Çatalhöyük N      | TUR Marmara Barcın N         | 0.527        | 0.473        | 0.412        | 0.412        |
| CYP PPNB                 | 0.415        | TUR C Çatalhöyük N      | TUR Pınarbaşı EpiP           | 0.686        | 0.314        | 0.114        | 0.114        |
| CYP PPNB                 | 0.266        | TUR C Çatalhöyük N      | WHG                          | 0.956        | 0.044        | 0.016        | 0.016        |
| IRQ Bestansur PPN        | 0.038        | ARM Aknashen N          | MAR Taforalt EpiP            | 0.967        | 0.033        | 0.065        | 0.065        |
| IRQ Bestansur PPN        | 0.066        | ARM Aknashen N          | RUS AfontovaGora3            | 0.776        | 0.224        | 0.247        | 0.247        |
| IRQ Bestansur PPN        | 0.066        | ARM Aknashen N          | RUS MA1 HG                   | 0.945        | 0.055        | 0.114        | 0.114        |
| IRQ Bestansur PPN        | 0.462        | ARM Aknashen N          | TUR C AşikliHöyük PPN        | 0.998        | 0.002        | 2.030        | 2.030        |
| IRQ Bestansur PPN        | 0.337        | ARM Masis Blur N        | CHG                          | 0.865        | 0.135        | 0.712        | 0.712        |
| IRQ Bestansur PPN        | 0.382        | ARM Masis Blur N        | IRN Ganj Dareh N             | 0.877        | 0.123        | 0.416        | 0.416        |
| IRQ Bestansur PPN        | 0.517        | ARM Masis Blur N        | RUS AfontovaGora3            | 0.779        | 0.221        | 0.142        | 0.142        |
| IRQ Bestansur PPN        | 0.384        | ARM Masis Blur N        | RUS MA1 HG                   | 0.979        | 0.021        | 0.087        | 0.087        |
| IRQ Bestansur PPN        | 0.203        | AZE N                   | IRN Ganj Dareh N             | 0.465        | 0.535        | 0.302        | 0.302        |
| IRQ Bestansur PPN        | 0.040        | AZE N                   | MAR Taforalt EpiP            | 0.928        | 0.072        | 0.089        | 0.089        |
| IRQ Bestansur PPN        | 0.045        | AZE N                   | RUS AfontovaGora3            | 0.708        | 0.292        | 0.339        | 0.339        |
| IRQ Bestansur PPN        | 0.278        | CHG                     | ISR Natufian EpiP            | 0.357        | 0.643        | 0.211        | 0.211        |
| IRQ Bestansur PPN        | 0.104        | CHG                     | Levant PPN                   | 0.594        | 0.406        | 0.285        | 0.285        |
| IRQ Bestansur PPN        | 0.144        | CHG                     | MAR Taforalt EpiP            | 0.965        | 0.035        | 0.121        | 0.121        |
| IRQ Bestansur PPN        | 0.026        | CHG                     | TUR Pınarbaşı EpiP           | 0.990        | 0.010        | 0.657        | 0.657        |
| IRQ Bestansur PPN        | 0.249        | CYP PPNB                | IRN Ganj Dareh N             | 0.833        | 0.167        | 0.634        | 0.634        |
| IRQ Bestansur PPN        | 0.392        | CYP PPNB                | RUS AfontovaGora3            | 0.787        | 0.213        | 0.122        | 0.122        |
| IRQ Bestansur PPN        | 0.225        | CYP PPNB                | RUS MA1 HG                   | 0.961        | 0.039        | 0.065        | 0.065        |
| IRQ Bestansur PPN        | 0.207        | CYP PPNB                | WHG                          | 0.999        | 0.001        | 0.021        | 0.021        |
| IRQ Bestansur PPN        | 0.039        | EHG                     | IRN Ganj Dareh N             | 0.002        | 0.998        | 0.088        | 0.088        |
| IRQ Bestansur PPN        | 0.110        | EHG                     | ISR Natufian EpiP            | 0.089        | 0.911        | 0.050        | 0.050        |
| IRQ Bestansur PPN        | 0.365        | IRN Ganj Dareh N        | ISR Natufian EpiP            | 0.375        | 0.625        | 0.228        | 0.228        |
| IRQ Bestansur PPN        | 0.290        | IRN Ganj Dareh N        | Levant PPN                   | 0.664        | 0.336        | 0.164        | 0.164        |
| IRQ Bestansur PPN        | 0.256        | IRN Ganj Dareh N        | TUR C AşikliHöyük PPN        | 0.188        | 0.812        | 0.220        | 0.220        |
| IRQ Bestansur PPN        | 0.106        | IRN Ganj Dareh N        | TUR C Boncuklu PPN           | 0.844        | 0.156        | 0.129        | 0.129        |
| IRQ Bestansur PPN        | 0.335        | IRN Ganj Dareh N        | TUR C Çatalhöyük N           | 0.049        | 0.951        | 0.836        | 0.836        |
| <b>IRQ Bestansur PPN</b> | <b>0.136</b> | <b>IRN Ganj Dareh N</b> | <b>TUR Marmara Barcın N</b>  | <b>0.782</b> | <b>0.218</b> | <b>0.143</b> | <b>0.143</b> |
| IRQ Bestansur PPN        | 0.085        | IRN Ganj Dareh N        | TUR Pınarbaşı EpiP           | 0.790        | 0.210        | 0.166        | 0.166        |
| IRQ Bestansur PPN        | 0.208        | IRN Ganj Dareh N        | WHG                          | 0.973        | 0.027        | 0.044        | 0.044        |
| IRQ Bestansur PPN        | 0.554        | ISR Natufian EpiP       | Mesopotamia PPN              | 0.410        | 0.590        | 1.203        | 1.203        |
| IRQ Bestansur PPN        | 0.440        | ISR Natufian EpiP       | RUS AfontovaGora3            | 0.662        | 0.338        | 0.118        | 0.118        |
| IRQ Bestansur PPN        | 0.174        | ISR Natufian EpiP       | RUS MA1 HG                   | 0.852        | 0.148        | 0.078        | 0.078        |
| IRQ Bestansur PPN        | 0.054        | ISR Natufian EpiP       | SRB Iron Gates HG            | 0.988        | 0.012        | 0.032        | 0.032        |
| IRQ Bestansur PPN        | 0.045        | ISR Natufian EpiP       | TUR Marmara Barcın N         | 0.978        | 0.022        | 0.151        | 0.151        |
| IRQ Bestansur PPN        | 0.036        | ISR Natufian EpiP       | TUR Pınarbaşı EpiP           | 0.915        | 0.085        | 0.188        | 0.188        |
| IRQ Bestansur PPN        | 0.063        | ISR Natufian EpiP       | WHG                          | 0.965        | 0.035        | 0.029        | 0.029        |
| IRQ Bestansur PPN        | 0.086        | Levant PPN              | RUS AfontovaGora3            | 0.430        | 0.570        | 0.129        | 0.129        |
| IRQ Bestansur PPN        | 0.440        | Mesopotamia PPN         | MAR Taforalt EpiP            | 0.998        | 0.002        | 0.085        | 0.085        |
| IRQ Bestansur PPN        | 0.610        | Mesopotamia PPN         | RUS AfontovaGora3            | 0.756        | 0.244        | 0.180        | 0.180        |
| IRQ Bestansur PPN        | 0.561        | Mesopotamia PPN         | RUS MA1 HG                   | 0.972        | 0.028        | 0.116        | 0.116        |
| IRQ Bestansur PPN        | 0.188        | MAR Taforalt EpiP       | TUR C AşikliHöyük PPN        | 0.049        | 0.951        | 0.031        | 0.031        |
| IRQ Bestansur PPN        | 0.042        | RUS AfontovaGora3       | TUR C AşikliHöyük PPN        | 0.060        | 0.940        | 0.215        | 0.215        |
| IRQ Bestansur PPN        | 0.304        | RUS AfontovaGora3       | TUR C Çatalhöyük N           | 0.168        | 0.832        | 0.262        | 0.262        |
| IRQ Bestansur PPN        | 0.206        | TUR C Çatalhöyük N      | TUR Pınarbaşı EpiP           | 0.971        | 0.029        | 0.163        | 0.163        |
| IRQ Bestansur PPN        | 0.929        | TUR C Çatalhöyük N      | WHG                          | 0.992        | 0.008        | 0.033        | 0.033        |
| IRQ Shanidar N           | 0.184        | ARM Aknashen N          | CYP PPNB                     | 0.941        | 0.059        | 0.629        | 0.629        |
| IRQ Shanidar N           | 0.122        | ARM Aknashen N          | EHG                          | 0.996        | 0.004        | 0.028        | 0.028        |
| IRQ Shanidar N           | 0.442        | ARM Aknashen N          | IRN Ganj Dareh N             | 0.723        | 0.277        | 0.155        | 0.155        |
| IRQ Shanidar N           | 0.140        | ARM Aknashen N          | ISR Natufian EpiP            | 0.938        | 0.062        | 0.155        | 0.155        |
| IRQ Shanidar N           | 0.219        | ARM Aknashen N          | Levant PPN                   | 0.955        | 0.045        | 0.046        | 0.046        |
| IRQ Shanidar N           | 0.759        | ARM Aknashen N          | MAR Taforalt EpiP            | 0.930        | 0.070        | 0.025        | 0.025        |
| IRQ Shanidar N           | 0.153        | ARM Aknashen N          | RUS AfontovaGora3            | 0.932        | 0.068        | 0.069        | 0.069        |
| IRQ Shanidar N           | 0.203        | ARM Aknashen N          | RUS MA1 HG                   | 0.968        | 0.032        | 0.039        | 0.039        |
| IRQ Shanidar N           | 0.175        | ARM Aknashen N          | TUR C Boncuklu PPN           | 0.978        | 0.022        | 0.053        | 0.053        |
| IRQ Shanidar N           | 0.170        | ARM Aknashen N          | TUR C Çatalhöyük N           | 0.998        | 0.002        | 0.233        | 0.233        |
| IRQ Shanidar N           | 0.170        | ARM Aknashen N          | TUR Marmara Barcın N         | 0.983        | 0.017        | 0.058        | 0.058        |
| IRQ Shanidar N           | 0.113        | ARM Aknashen N          | TUR Pınarbaşı EpiP           | 0.977        | 0.023        | 0.068        | 0.068        |
| IRQ Shanidar N           | 0.112        | ARM Aknashen N          | WHG                          | 0.998        | 0.002        | 0.015        | 0.015        |
| IRQ Shanidar N           | 0.043        | ARM Masis Blur N        | CHG                          | 0.966        | 0.034        | 0.450        | 0.450        |
| IRQ Shanidar N           | 0.525        | ARM Masis Blur N        | IRN Ganj Dareh N             | 0.645        | 0.355        | 0.131        | 0.131        |

|                        |              |                          |                              |              |              |              |              |
|------------------------|--------------|--------------------------|------------------------------|--------------|--------------|--------------|--------------|
| IRQ Shanidar N         | 0.153        | ARM Masis Blur N         | MAR Taforalt EpiP            | 0.962        | 0.038        | 0.027        | 0.027        |
| IRQ Shanidar N         | 0.051        | ARM Masis Blur N         | RUS MA1 HG                   | 0.992        | 0.008        | 0.041        | 0.041        |
| IRQ Shanidar N         | 0.029        | AZE N                    | CHG                          | 0.441        | 0.559        | 0.237        | 0.237        |
| IRQ Shanidar N         | 0.633        | AZE N                    | IRN Ganj Dareh N             | 0.466        | 0.534        | 0.101        | 0.101        |
| IRQ Shanidar N         | 0.096        | AZE N                    | ISR Natufian EpiP            | 0.982        | 0.018        | 2.719        | 2.719        |
| IRQ Shanidar N         | 0.038        | CHG                      | CYP PPNB                     | 0.179        | 0.821        | 0.309        | 0.309        |
| IRQ Shanidar N         | 0.028        | CHG                      | ISR Natufian EpiP            | 0.597        | 0.403        | 0.142        | 0.142        |
| IRQ Shanidar N         | 0.039        | CHG                      | Levant PPN                   | 0.801        | 0.199        | 0.085        | 0.085        |
| IRQ Shanidar N         | 0.018        | CHG                      | MAR Taforalt EpiP            | 0.904        | 0.096        | 0.044        | 0.044        |
| IRQ Shanidar N         | 0.161        | CHG                      | TUR C AşiklîHöyük PPN        | 0.151        | 0.849        | 0.121        | 0.121        |
| IRQ Shanidar N         | 0.010        | CHG                      | TUR C Boncuklu PPN           | 0.886        | 0.114        | 0.085        | 0.085        |
| IRQ Shanidar N         | 0.077        | CHG                      | TUR C Çatalhöyük N           | 0.502        | 0.498        | 0.166        | 0.166        |
| IRQ Shanidar N         | 0.010        | CHG                      | TUR Marmara Barcin N         | 0.870        | 0.130        | 0.096        | 0.096        |
| IRQ Shanidar N         | 0.557        | CYP PPNB                 | IRN Ganj Dareh N             | 0.636        | 0.364        | 0.098        | 0.098        |
| IRQ Shanidar N         | 0.028        | IRN Ganj Dareh N         | ISR Natufian EpiP            | 0.594        | 0.406        | 0.103        | 0.103        |
| IRQ Shanidar N         | 0.032        | IRN Ganj Dareh N         | Levant PPN                   | 0.829        | 0.171        | 0.054        | 0.054        |
| <b>IRQ Shanidar N</b>  | <b>0.441</b> | <b>IRN Ganj Dareh N</b>  | <b>Mesopotamia PPN</b>       | <b>0.284</b> | <b>0.716</b> | <b>0.155</b> | <b>0.155</b> |
| IRQ Shanidar N         | 0.917        | IRN Ganj Dareh N         | TUR C AşiklîHöyük PPN        | 0.252        | 0.748        | 0.073        | 0.073        |
| IRQ Shanidar N         | 0.656        | IRN Ganj Dareh N         | TUR C Boncuklu PPN           | 0.777        | 0.223        | 0.047        | 0.047        |
| IRQ Shanidar N         | 0.768        | IRN Ganj Dareh N         | TUR C Çatalhöyük N           | 0.519        | 0.481        | 0.087        | 0.087        |
| <b>IRQ Shanidar N</b>  | <b>0.578</b> | <b>IRN Ganj Dareh N</b>  | <b>TUR Marmara Barcin N</b>  | <b>0.758</b> | <b>0.242</b> | <b>0.051</b> | <b>0.051</b> |
| IRQ Shanidar N         | 0.664        | IRN Ganj Dareh N         | TUR Pınarbaşı EpiP           | 0.801        | 0.199        | 0.059        | 0.059        |
| IRQ Shanidar N         | 0.128        | Mesopotamia PPN          | MAR Taforalt EpiP            | 0.988        | 0.012        | 0.032        | 0.032        |
| IRQ Shanidar N         | 0.013        | MAR Taforalt EpiP        | TUR C AşiklîHöyük PPN        | 0.012        | 0.988        | 0.015        | 0.015        |
| IRQ Shanidar N         | 0.017        | RUS AfontovaGora3        | TUR C AşiklîHöyük PPN        | 0.042        | 0.958        | 0.038        | 0.038        |
| IRQ Shanidar N         | 0.024        | RUS MA1 HG               | TUR C AşiklîHöyük PPN        | 0.017        | 0.983        | 0.023        | 0.023        |
| <b>Levant PPN</b>      | <b>0.453</b> | <b>CYP PPNB</b>          | <b>ISR Natufian EpiP</b>     | <b>0.541</b> | <b>0.459</b> | <b>0.049</b> | <b>0.049</b> |
| <b>Levant PPN</b>      | <b>0.949</b> | <b>ISR Natufian EpiP</b> | <b>TUR C AşiklîHöyük PPN</b> | <b>0.482</b> | <b>0.518</b> | <b>0.044</b> | <b>0.044</b> |
| <b>Levant PPN</b>      | <b>0.358</b> | <b>ISR Natufian EpiP</b> | <b>TUR C Boncuklu PPN</b>    | <b>0.806</b> | <b>0.194</b> | <b>0.023</b> | <b>0.023</b> |
| <b>Levant PPN</b>      | <b>0.333</b> | <b>ISR Natufian EpiP</b> | <b>TUR C Çatalhöyük N</b>    | <b>0.659</b> | <b>0.341</b> | <b>0.037</b> | <b>0.037</b> |
| <b>Levant PPN</b>      | <b>0.441</b> | <b>ISR Natufian EpiP</b> | <b>TUR Marmara Barcin N</b>  | <b>0.771</b> | <b>0.229</b> | <b>0.026</b> | <b>0.026</b> |
| <b>Levant PPN</b>      | <b>0.053</b> | <b>ISR Natufian EpiP</b> | <b>TUR Pınarbaşı EpiP</b>    | <b>0.799</b> | <b>0.201</b> | <b>0.027</b> | <b>0.027</b> |
| Mesopotamia PPN        | 0.891        | ARM Aknashen N           | ARM Masis Blur N             | 0.973        | 0.027        | 0.676        | 0.676        |
| Mesopotamia PPN        | 0.849        | ARM Aknashen N           | AZE N                        | 0.852        | 0.148        | 0.333        | 0.333        |
| Mesopotamia PPN        | 0.875        | ARM Aknashen N           | CHG                          | 0.952        | 0.048        | 0.072        | 0.072        |
| Mesopotamia PPN        | 0.870        | ARM Aknashen N           | IRN Ganj Dareh N             | 0.958        | 0.042        | 0.062        | 0.062        |
| Mesopotamia PPN        | 0.845        | ARM Aknashen N           | ISR Natufian EpiP            | 0.941        | 0.059        | 0.073        | 0.073        |
| Mesopotamia PPN        | 0.860        | ARM Aknashen N           | Levant PPN                   | 0.977        | 0.023        | 0.039        | 0.039        |
| Mesopotamia PPN        | 0.965        | ARM Aknashen N           | MAR Taforalt EpiP            | 0.974        | 0.026        | 0.017        | 0.017        |
| Mesopotamia PPN        | 0.793        | ARM Aknashen N           | RUS AfontovaGora3            | 0.989        | 0.011        | 0.038        | 0.038        |
| Mesopotamia PPN        | 0.840        | ARM Aknashen N           | RUS MA1 HG                   | 0.992        | 0.008        | 0.025        | 0.025        |
| Mesopotamia PPN        | 0.767        | ARM Aknashen N           | SRB Iron Gates HG            | 0.996        | 0.004        | 0.011        | 0.011        |
| Mesopotamia PPN        | 0.881        | ARM Aknashen N           | TUR C AşiklîHöyük PPN        | 0.987        | 0.013        | 0.632        | 0.632        |
| Mesopotamia PPN        | 0.830        | ARM Aknashen N           | TUR C Çatalhöyük N           | 0.986        | 0.014        | 0.113        | 0.113        |
| Mesopotamia PPN        | 0.823        | ARM Aknashen N           | TUR Pınarbaşı EpiP           | 0.991        | 0.009        | 0.045        | 0.045        |
| Mesopotamia PPN        | 0.766        | ARM Aknashen N           | WHG                          | 0.999        | 0.001        | 0.011        | 0.011        |
| Mesopotamia PPN        | 0.134        | ARM Masis Blur N         | CHG                          | 0.892        | 0.108        | 0.068        | 0.068        |
| Mesopotamia PPN        | 0.767        | ARM Masis Blur N         | IRN Ganj Dareh N             | 0.833        | 0.167        | 0.050        | 0.050        |
| Mesopotamia PPN        | 0.089        | ARM Masis Blur N         | MAR Taforalt EpiP            | 0.975        | 0.025        | 0.016        | 0.016        |
| Mesopotamia PPN        | 0.042        | ARM Masis Blur N         | RUS AfontovaGora3            | 0.986        | 0.014        | 0.036        | 0.036        |
| Mesopotamia PPN        | 0.065        | ARM Masis Blur N         | RUS MA1 HG                   | 0.996        | 0.004        | 0.024        | 0.024        |
| Mesopotamia PPN        | 0.490        | AZE N                    | CHG                          | 0.936        | 0.064        | 0.084        | 0.084        |
| Mesopotamia PPN        | 0.707        | AZE N                    | IRN Ganj Dareh N             | 0.863        | 0.137        | 0.061        | 0.061        |
| Mesopotamia PPN        | 0.202        | AZE N                    | MAR Taforalt EpiP            | 0.986        | 0.014        | 0.021        | 0.021        |
| Mesopotamia PPN        | 0.031        | CHG                      | CYP PPNB                     | 0.236        | 0.764        | 0.057        | 0.057        |
| <b>Mesopotamia PPN</b> | <b>0.194</b> | <b>CYP PPNB</b>          | <b>IRN Ganj Dareh N</b>      | <b>0.772</b> | <b>0.228</b> | <b>0.038</b> | <b>0.038</b> |
| <b>Mesopotamia PPN</b> | <b>0.160</b> | <b>IRN Ganj Dareh N</b>  | <b>TUR C AşiklîHöyük PPN</b> | <b>0.132</b> | <b>0.868</b> | <b>0.035</b> | <b>0.035</b> |
| Mesopotamia LBA        | 0.229        | ARM Aknashen N           | ISR Natufian EpiP            | 0.802        | 0.198        | 0.055        | 0.055        |
| Mesopotamia LBA        | 0.031        | ARM Aknashen N           | Levant PPN                   | 0.882        | 0.118        | 0.041        | 0.041        |
| Mesopotamia LBA        | 0.037        | ARM Aknashen N           | MAR Taforalt EpiP            | 0.951        | 0.049        | 0.016        | 0.016        |
| Mesopotamia LBA        | 0.468        | ARM Masis Blur N         | AZE N                        | 0.536        | 0.464        | 2.355        | 2.355        |
| Mesopotamia LBA        | 0.022        | ARM Masis Blur N         | CHG                          | 0.876        | 0.124        | 0.097        | 0.097        |
| Mesopotamia LBA        | 0.109        | ARM Masis Blur N         | IRN Ganj Dareh N             | 0.873        | 0.127        | 0.052        | 0.052        |
| Mesopotamia LBA        | 0.015        | ARM Masis Blur N         | ISR Natufian EpiP            | 0.901        | 0.099        | 0.073        | 0.073        |
| Mesopotamia LBA        | 0.195        | ARM Masis Blur N         | Mesopotamia PPN              | 0.141        | 0.859        | 0.501        | 0.501        |
| Mesopotamia LBA        | 0.049        | ARM Masis Blur N         | MAR Taforalt EpiP            | 0.973        | 0.027        | 0.016        | 0.016        |
| Mesopotamia LBA        | 0.844        | ARM Masis Blur N         | TUR C AşiklîHöyük PPN        | 0.822        | 0.178        | 3.428        | 3.428        |
| Mesopotamia LBA        | 0.206        | AZE N                    | CHG                          | 0.998        | 0.002        | 0.102        | 0.102        |
| Mesopotamia LBA        | 0.201        | AZE N                    | CYP PPNB                     | 0.901        | 0.099        | 0.117        | 0.117        |
| Mesopotamia LBA        | 0.174        | AZE N                    | IRN Ganj Dareh N             | 0.995        | 0.005        | 0.066        | 0.066        |
| Mesopotamia LBA        | 0.621        | AZE N                    | ISR Natufian EpiP            | 0.828        | 0.172        | 0.082        | 0.082        |
| Mesopotamia LBA        | 0.345        | AZE N                    | Levant PPN                   | 0.911        | 0.089        | 0.055        | 0.055        |
| Mesopotamia LBA        | 0.639        | AZE N                    | MAR Taforalt EpiP            | 0.946        | 0.054        | 0.022        | 0.022        |
| Mesopotamia LBA        | 0.134        | AZE N                    | SRB Iron Gates HG            | 0.999        | 0.001        | 0.016        | 0.016        |
| Mesopotamia LBA        | 0.610        | CHG                      | Levant PPN                   | 0.549        | 0.451        | 0.037        | 0.037        |
| Mesopotamia LBA        | 0.792        | CHG                      | Mesopotamia PPN              | 0.041        | 0.959        | 0.090        | 0.090        |
| Mesopotamia LBA        | 0.202        | CYP PPNB                 | Mesopotamia PPN              | 0.062        | 0.938        | 0.140        | 0.140        |
| Mesopotamia LBA        | 0.180        | EHG                      | Mesopotamia PPN              | 0.007        | 0.993        | 0.022        | 0.022        |
| Mesopotamia LBA        | 0.580        | ISR Natufian EpiP        | Mesopotamia PPN              | 0.166        | 0.834        | 0.065        | 0.065        |
| Mesopotamia LBA        | 0.506        | Levant PPN               | Mesopotamia PPN              | 0.091        | 0.909        | 0.046        | 0.046        |
| Mesopotamia LBA        | 0.455        | Mesopotamia PPN          | MAR Taforalt EpiP            | 0.968        | 0.032        | 0.018        | 0.018        |
| Mesopotamia LBA        | 0.196        | Mesopotamia PPN          | RUS AfontovaGora3            | 0.958        | 0.042        | 0.035        | 0.035        |
| Mesopotamia LBA        | 0.290        | Mesopotamia PPN          | RUS MA1 HG                   | 0.971        | 0.029        | 0.024        | 0.024        |
| Mesopotamia LBA        | 0.253        | Mesopotamia PPN          | SRB Iron Gates HG            | 0.985        | 0.015        | 0.013        | 0.013        |
| Mesopotamia LBA        | 0.195        | Mesopotamia PPN          | TUR C Boncuklu PPN           | 0.988        | 0.012        | 0.045        | 0.045        |
| Mesopotamia LBA        | 0.211        | Mesopotamia PPN          | TUR C Çatalhöyük N           | 0.926        | 0.074        | 0.119        | 0.119        |
| Mesopotamia LBA        | 0.210        | Mesopotamia PPN          | TUR Marmara Barcin N         | 0.968        | 0.032        | 0.054        | 0.054        |
| Mesopotamia LBA        | 0.203        | Mesopotamia PPN          | TUR Pınarbaşı EpiP           | 0.938        | 0.062        | 0.058        | 0.058        |
| Mesopotamia LBA        | 0.186        | Mesopotamia PPN          | WHG                          | 0.996        | 0.004        | 0.013        | 0.013        |
| TUR C AşiklîHöyük PPN  | 0.790        | ARM Aknashen N           | ARM Masis Blur N             | 0.043        | 0.957        | 1.195        | 1.195        |
| TUR C AşiklîHöyük PPN  | 0.273        | ARM Aknashen N           | CYP PPNB                     | 0.028        | 0.972        | 0.246        | 0.246        |
| TUR C AşiklîHöyük PPN  | 0.011        | ARM Aknashen N           | SRB Iron Gates HG            | 0.992        | 0.008        | 0.015        | 0.015        |

|                              |              |                              |                           |              |              |              |              |
|------------------------------|--------------|------------------------------|---------------------------|--------------|--------------|--------------|--------------|
| TUR C AşikliHöyük PPN        | 0.217        | ARM Aknashen N               | TUR C Boncuklu PPN        | 0.715        | 0.285        | 0.134        | 0.134        |
| TUR C AşikliHöyük PPN        | 0.105        | ARM Aknashen N               | TUR Marmara Barcin N      | 0.671        | 0.329        | 0.187        | 0.187        |
| TUR C AşikliHöyük PPN        | 0.910        | ARM Aknashen N               | TUR Pınarbaşı EpiP        | 0.752        | 0.248        | 0.086        | 0.086        |
| TUR C AşikliHöyük PPN        | 0.345        | ARM Masis Blur N             | EHG                       | 0.998        | 0.002        | 0.027        | 0.027        |
| TUR C AşikliHöyük PPN        | 0.500        | ARM Masis Blur N             | TUR C Boncuklu PPN        | 0.891        | 0.109        | 0.126        | 0.126        |
| TUR C AşikliHöyük PPN        | 0.417        | ARM Masis Blur N             | TUR Marmara Barcin N      | 0.925        | 0.075        | 0.219        | 0.219        |
| TUR C AşikliHöyük PPN        | 0.690        | ARM Masis Blur N             | TUR Pınarbaşı EpiP        | 0.885        | 0.115        | 0.106        | 0.106        |
| TUR C AşikliHöyük PPN        | 0.444        | ARM Masis Blur N             | WHG                       | 0.996        | 0.004        | 0.013        | 0.013        |
| TUR C AşikliHöyük PPN        | 0.292        | AZE N                        | TUR Pınarbaşı EpiP        | 0.716        | 0.284        | 0.132        | 0.132        |
| TUR C AşikliHöyük PPN        | 0.246        | CHG                          | TUR Pınarbaşı EpiP        | 0.305        | 0.695        | 0.091        | 0.091        |
| TUR C AşikliHöyük PPN        | 0.231        | CYP PPNB                     | TUR C Boncuklu PPN        | 1.000        | 0.000        | 0.126        | 0.126        |
| TUR C AşikliHöyük PPN        | 0.317        | CYP PPNB                     | TUR C Çatalhöyük N        | 0.329        | 0.671        | 0.720        | 0.720        |
| TUR C AşikliHöyük PPN        | 0.010        | IRN Ganj Dareh N             | TUR C Boncuklu PPN        | 0.160        | 0.840        | 0.061        | 0.061        |
| TUR C AşikliHöyük PPN        | 0.150        | IRN Ganj Dareh N             | TUR Pınarbaşı EpiP        | 0.294        | 0.706        | 0.061        | 0.061        |
| TUR C AşikliHöyük PPN        | 0.016        | Levant PPN                   | TUR C Çatalhöyük N        | 0.003        | 0.997        | 0.080        | 0.080        |
| TUR C AşikliHöyük PPN        | 0.038        | Mesopotamia PPN              | TUR C Boncuklu PPN        | 0.659        | 0.341        | 0.175        | 0.175        |
| <b>TUR C AşikliHöyük PPN</b> | <b>0.251</b> | <b>Mesopotamia PPN</b>       | <b>TUR Pınarbaşı EpiP</b> | <b>0.699</b> | <b>0.301</b> | <b>0.108</b> | <b>0.108</b> |
| TUR C AşikliHöyük PPN        | 0.015        | MAR Taforalt EpiP            | TUR C Boncuklu PPN        | 0.051        | 0.949        | 0.027        | 0.027        |
| TUR C AşikliHöyük PPN        | 0.015        | TUR C Boncuklu PPN           | TUR C Çatalhöyük N        | 0.089        | 0.911        | 0.561        | 0.561        |
| TUR C AşikliHöyük PPN        | 0.311        | TUR C Çatalhöyük N           | TUR Pınarbaşı EpiP        | 0.992        | 0.008        | 0.175        | 0.175        |
| TUR C AşikliHöyük PPN        | 0.165        | TUR Marmara Barcin N         | TUR Pınarbaşı EpiP        | 0.936        | 0.064        | 2.286        | 2.286        |
| TUR C Boncuklu PPN           | 0.625        | ARM Aknashen N               | TUR Pınarbaşı EpiP        | 0.336        | 0.664        | 0.066        | 0.066        |
| TUR C Boncuklu PPN           | 0.554        | ARM Masis Blur N             | TUR Pınarbaşı EpiP        | 0.416        | 0.584        | 0.081        | 0.081        |
| TUR C Boncuklu PPN           | 0.459        | AZE N                        | TUR Pınarbaşı EpiP        | 0.245        | 0.755        | 0.051        | 0.051        |
| TUR C Boncuklu PPN           | 0.823        | CHG                          | TUR Pınarbaşı EpiP        | 0.112        | 0.888        | 0.045        | 0.045        |
| TUR C Boncuklu PPN           | 0.030        | EHG                          | TUR C AşikliHöyük PPN     | 0.036        | 0.964        | 0.013        | 0.013        |
| TUR C Boncuklu PPN           | 0.207        | IRN Ganj Dareh N             | TUR Pınarbaşı EpiP        | 0.122        | 0.878        | 0.031        | 0.031        |
| <b>TUR C Boncuklu PPN</b>    | <b>0.424</b> | <b>Mesopotamia PPN</b>       | <b>TUR Pınarbaşı EpiP</b> | <b>0.263</b> | <b>0.737</b> | <b>0.055</b> | <b>0.055</b> |
| TUR C Boncuklu PPN           | 0.429        | SRB Iron Gates HG            | TUR C AşikliHöyük PPN     | 0.022        | 0.978        | 0.007        | 0.007        |
| TUR C Boncuklu PPN           | 0.223        | TUR C AşikliHöyük PPN        | TUR Pınarbaşı EpiP        | 0.622        | 0.378        | 0.141        | 0.141        |
| TUR C Boncuklu PPN           | 0.296        | TUR C AşikliHöyük PPN        | WHG                       | 0.968        | 0.032        | 0.008        | 0.008        |
| TUR C Boncuklu PPN           | 0.042        | TUR C Çatalhöyük N           | TUR Pınarbaşı EpiP        | 0.309        | 0.691        | 0.091        | 0.091        |
| TUR C Çatalhöyük N           | 0.324        | ARM Aknashen N               | CYP PPNB                  | 0.214        | 0.786        | 0.079        | 0.079        |
| TUR C Çatalhöyük N           | 0.286        | ARM Aknashen N               | TUR C AşikliHöyük PPN     | 0.221        | 0.779        | 0.078        | 0.078        |
| TUR C Çatalhöyük N           | 0.145        | ARM Masis Blur N             | CYP PPNB                  | 0.284        | 0.716        | 0.219        | 0.219        |
| TUR C Çatalhöyük N           | 0.012        | ARM Masis Blur N             | Levant PPN                | 0.903        | 0.097        | 0.058        | 0.058        |
| TUR C Çatalhöyük N           | 0.374        | ARM Masis Blur N             | TUR C AşikliHöyük PPN     | 0.320        | 0.680        | 0.116        | 0.116        |
| TUR C Çatalhöyük N           | 0.070        | ARM Masis Blur N             | TUR Pınarbaşı EpiP        | 0.973        | 0.027        | 0.073        | 0.073        |
| TUR C Çatalhöyük N           | 0.174        | AZE N                        | CYP PPNB                  | 0.114        | 0.886        | 0.048        | 0.048        |
| TUR C Çatalhöyük N           | 0.275        | AZE N                        | TUR C AşikliHöyük PPN     | 0.134        | 0.866        | 0.050        | 0.050        |
| TUR C Çatalhöyük N           | 0.143        | CHG                          | CYP PPNB                  | 0.042        | 0.958        | 0.033        | 0.033        |
| TUR C Çatalhöyük N           | 0.331        | CHG                          | TUR C AşikliHöyük PPN     | 0.082        | 0.918        | 0.026        | 0.026        |
| TUR C Çatalhöyük N           | 0.251        | CYP PPNB                     | IRN Ganj Dareh N          | 0.944        | 0.056        | 0.021        | 0.021        |
| TUR C Çatalhöyük N           | 0.028        | CYP PPNB                     | ISR Natufian EpiP         | 0.925        | 0.075        | 0.071        | 0.071        |
| TUR C Çatalhöyük N           | 0.028        | CYP PPNB                     | Levant PPN                | 0.967        | 0.013        | 0.040        | 0.040        |
| TUR C Çatalhöyük N           | 0.282        | CYP PPNB                     | Mesopotamia PPN           | 0.849        | 0.151        | 0.056        | 0.056        |
| TUR C Çatalhöyük N           | 0.023        | CYP PPNB                     | MAR Taforalt EpiP         | 0.992        | 0.008        | 0.010        | 0.010        |
| TUR C Çatalhöyük N           | 0.017        | CYP PPNB                     | RUS AfontovaGora3         | 0.988        | 0.012        | 0.029        | 0.029        |
| TUR C Çatalhöyük N           | 0.029        | CYP PPNB                     | RUS MA1 HG                | 0.997        | 0.003        | 0.017        | 0.017        |
| TUR C Çatalhöyük N           | 0.057        | CYP PPNB                     | TUR C AşikliHöyük PPN     | 0.372        | 0.628        | 0.379        | 0.379        |
| TUR C Çatalhöyük N           | 0.294        | EHG                          | TUR C AşikliHöyük PPN     | 0.036        | 0.964        | 0.012        | 0.012        |
| TUR C Çatalhöyük N           | 0.140        | IRN Ganj Dareh N             | TUR C AşikliHöyük PPN     | 0.050        | 0.950        | 0.022        | 0.022        |
| TUR C Çatalhöyük N           | 0.103        | Mesopotamia PPN              | TUR C AşikliHöyük PPN     | 0.134        | 0.866        | 0.068        | 0.068        |
| TUR C Çatalhöyük N           | 0.031        | MAR Taforalt EpiP            | TUR C AşikliHöyük PPN     | 0.006        | 0.994        | 0.009        | 0.009        |
| TUR C Çatalhöyük N           | 0.155        | RUS AfontovaGora3            | TUR C AşikliHöyük PPN     | 0.047        | 0.953        | 0.025        | 0.025        |
| TUR C Çatalhöyük N           | 0.286        | RUS MA1 HG                   | TUR C AşikliHöyük PPN     | 0.038        | 0.962        | 0.013        | 0.013        |
| TUR C Çatalhöyük N           | 0.066        | SRB Iron Gates HG            | TUR C AşikliHöyük PPN     | 0.014        | 0.986        | 0.006        | 0.006        |
| TUR C Çatalhöyük N           | 0.024        | TUR C AşikliHöyük PPN        | TUR Marmara Barcin N      | 0.931        | 0.069        | 0.150        | 0.150        |
| <b>TUR C Çatalhöyük N</b>    | <b>0.423</b> | <b>TUR C AşikliHöyük PPN</b> | <b>TUR Pınarbaşı EpiP</b> | <b>0.961</b> | <b>0.039</b> | <b>0.048</b> | <b>0.048</b> |
| TUR C Çatalhöyük N           | 0.066        | TUR C AşikliHöyük PPN        | WHG                       | 0.986        | 0.014        | 0.007        | 0.007        |
| TUR Marmara Barcin N         | 0.083        | ARM Aknashen N               | CYP PPNB                  | 0.025        | 0.975        | 0.044        | 0.044        |
| TUR Marmara Barcin N         | 0.089        | ARM Masis Blur N             | CYP PPNB                  | 0.056        | 0.944        | 0.079        | 0.079        |
| TUR Marmara Barcin N         | 0.074        | AZE N                        | CYP PPNB                  | 0.000        | 1.000        | 0.031        | 0.031        |
| TUR Marmara Barcin N         | 0.060        | CHG                          | CYP PPNB                  | 0.004        | 0.996        | 0.021        | 0.021        |
| TUR Marmara Barcin N         | 0.136        | CYP PPNB                     | EHG                       | 0.983        | 0.017        | 0.011        | 0.011        |
| TUR Marmara Barcin N         | 0.083        | CYP PPNB                     | RUS AfontovaGora3         | 0.981        | 0.019        | 0.014        | 0.014        |
| TUR Marmara Barcin N         | 0.112        | CYP PPNB                     | RUS MA1 HG                | 0.989        | 0.011        | 0.011        | 0.011        |
| TUR Marmara Barcin N         | 0.164        | CYP PPNB                     | SRB Iron Gates HG         | 0.989        | 0.011        | 0.006        | 0.006        |
| TUR Marmara Barcin N         | 0.132        | CYP PPNB                     | TUR C Boncuklu PPN        | 0.907        | 0.093        | 0.068        | 0.068        |
| TUR Marmara Barcin N         | 0.081        | CYP PPNB                     | TUR Pınarbaşı EpiP        | 0.908        | 0.092        | 0.083        | 0.083        |
| TUR Marmara Barcin N         | 0.129        | CYP PPNB                     | WHG                       | 0.993        | 0.007        | 0.006        | 0.006        |
| TUR Marmara Barcin N         | 0.052        | EHG                          | TUR C AşikliHöyük PPN     | 0.025        | 0.975        | 0.011        | 0.011        |
| TUR Marmara Barcin N         | 0.190        | SRB Iron Gates HG            | TUR C AşikliHöyük PPN     | 0.013        | 0.987        | 0.006        | 0.006        |
| <b>TUR Marmara Barcin N</b>  | <b>0.050</b> | <b>TUR C AşikliHöyük PPN</b> | <b>TUR Pınarbaşı EpiP</b> | <b>0.833</b> | <b>0.167</b> | <b>0.077</b> | <b>0.077</b> |
| TUR Marmara Barcin N         | 0.108        | TUR C AşikliHöyük PPN        | WHG                       | 0.975        | 0.025        | 0.007        | 0.007        |
| <b>TUR Marmara Barcin N</b>  | <b>0.164</b> | <b>TUR C Çatalhöyük N</b>    | <b>TUR Pınarbaşı EpiP</b> | <b>0.553</b> | <b>0.447</b> | <b>0.056</b> | <b>0.056</b> |

**Table S 2 Test populations that fit as 2-way mixtures of the Source populations. Models discussed in the text are highlighted in bold.**



|                            | P-value  | Mixture Proportions |          |           | Standard Errors |          |           |
|----------------------------|----------|---------------------|----------|-----------|-----------------|----------|-----------|
|                            |          | CHG                 | Natufian | Pınarbaşı | CHG             | Natufian | Pınarbaşı |
| ALB_N                      | 0.412    | 0.182               | 0.431    | 0.386     | 0.087           | 0.129    | 0.124     |
| ARM_Aknashen_N             | 0.512    | 0.54                | 0.243    | 0.217     | 0.115           | 0.116    | 0.084     |
| ARM_Masis_Blur_N           | 0.977    | 0.346               | 0.36     | 0.294     | 0.067           | 0.088    | 0.077     |
| AZE_N                      | 0.194    | 0.438               | 0.32     | 0.241     | 0.05            | 0.05     | 0.046     |
| CYP_PPNB                   | 0.320    | 0.062               | 0.423    | 0.515     | 0.074           | 0.092    | 0.09      |
| IRN_Ganj_Dareh_N           | 1.44E-04 | 1.113               | 0.262    | -0.375    | 0.087           | 0.082    | 0.062     |
| IRN_Ganj_Dareh_N           | 1.77E-15 | 1.079               | -0.079   | 0         | 0.094           | 0.094    | 0         |
| IRQ_Bestansur_PPN          | 0.122    | 0.401               | 0.668    | -0.069    | 0.334           | 0.211    | 0.248     |
| IRQ_Bestansur_PPN          | 0.278    | 0.357               | 0.643    | 0         | 0.211           | 0.211    | 0         |
| IRQ_Shanidar_N             | 0.172    | 0.67                | 0.506    | -0.176    | 0.133           | 0.155    | 0.117     |
| IRQ_Shanidar_N             | 0.028    | 0.597               | 0.403    | 0         | 0.142           | 0.142    | 0         |
| Levant_PPN                 | 0.424    | -0.012              | 0.812    | 0.2       | 0.038           | 0.026    | 0.044     |
| Levant_PPN                 | 0.053    | 0                   | 0.799    | 0.201     | 0               | 0.027    | 0.027     |
| Mesopotamia_LBA            | 0.670    | 0.419               | 0.423    | 0.158     | 0.058           | 0.054    | 0.054     |
| Mesopotamia_PPN            | 0.022    | 0.413               | 0.441    | 0.146     | 0.057           | 0.060    | 0.051     |
| I6445:IRQ_Nemrik9_PPNA     | 0.020    | 0.443               | 0.448    | 0.109     | 0.076           | 0.078    | 0.066     |
| I6457:IRQ_Nemrik9_PPNA     | 0.016    | 0.294               | 0.642    | 0.064     | 0.140           | 0.107    | 0.102     |
| I8432:TUR_SE_Mardin_PPN    | 0.255    | 0.277               | 0.532    | 0.191     | 0.076           | 0.080    | 0.072     |
| TUR_C_AşiklIHöyük_PPN      | 0.801    | 0.138               | 0.403    | 0.460     | 0.078           | 0.121    | 0.097     |
| TUR_C_Boncuklu_PPN_Feldman | 0.795    | 0.109               | 0.048    | 0.843     | 0.05            | 0.068    | 0.064     |
| TUR_C_Çatalhöyük_N         | 0.756    | 0.164               | 0.513    | 0.323     | 0.045           | 0.050    | 0.048     |
| TUR_Marmara_Barçın_N       | 0.549    | 0.071               | 0.258    | 0.671     | 0.037           | 0.045    | 0.048     |

**Table S 3 A common 3-way model for Neolithic Near Eastern populations.** For model fits with a negative admixture proportion, we also show the simpler 2-way model in which the negative source is omitted and marked in grey. For the Mesopotamia\_PPN population we also show the model fits for the 3 sampled individuals. These proportions are visualized in Fig. 3A.

|                       | X=CHG    |             |          |           |                 |          | X=IRN_Ganj_Dareh_N |          |             |          |           |                 |          |           |
|-----------------------|----------|-------------|----------|-----------|-----------------|----------|--------------------|----------|-------------|----------|-----------|-----------------|----------|-----------|
|                       | P-value  | Proportions |          |           | Standard Errors |          |                    | P-value  | Proportions |          |           | Standard Errors |          |           |
|                       |          | X           | Natufian | Pınarbaşı | X               | Natufian | Pınarbaşı          |          | X           | Natufian | Pınarbaşı | X               | Natufian | Pınarbaşı |
| ALB N                 | 5.79E-01 | 0.187       | 0.428    | 0.386     | 0.047           | 0.126    | 0.115              | 3.65E-01 | 0.157       | 0.362    | 0.481     | 0.061           | 0.157    | 0.136     |
| ARM Aknashen N        | 4.63E-01 | 0.649       | 0.196    | 0.154     | 0.082           | 0.120    | 0.067              | 3.23E-04 | 0.601       | -0.050   | 0.448     | 0.121           | 0.218    | 0.122     |
| ARM Masis Blur N      | 5.21E-01 | 0.430       | 0.346    | 0.224     | 0.052           | 0.098    | 0.069              | 9.21E-02 | 0.357       | 0.209    | 0.434     | 0.060           | 0.122    | 0.089     |
| AZE N                 | 5.05E-03 | 0.562       | 0.279    | 0.159     | 0.037           | 0.053    | 0.040              | 6.31E-05 | 0.471       | 0.156    | 0.374     | 0.037           | 0.065    | 0.047     |
| CYP PPNB              | 3.28E-01 | 0.125       | 0.392    | 0.484     | 0.043           | 0.090    | 0.084              | 4.81E-01 | 0.096       | 0.362    | 0.541     | 0.046           | 0.096    | 0.086     |
| IRQ Bestansur PPN     | 1.07E-01 | 0.616       | 0.708    | -0.324    | 0.380           | 0.282    | 0.193              | 1.94E-01 | 0.335       | 0.615    | 0.050     | 0.219           | 0.257    | 0.128     |
| IRQ Shanidar N        | 2.28E-01 | 0.720       | 0.534    | -0.253    | 0.134           | 0.160    | 0.072              | 4.43E-01 | 0.721       | 0.135    | 0.144     | 0.129           | 0.203    | 0.102     |
| Levant PPN            | 1.93E-02 | 0.077       | 0.807    | 0.115     | 0.022           | 0.026    | 0.032              | 1.22E-01 | 0.041       | 0.791    | 0.168     | 0.021           | 0.026    | 0.031     |
| Mesopotamia LBA       | 9.37E-02 | 0.538       | 0.390    | 0.073     | 0.041           | 0.058    | 0.045              | 8.73E-02 | 0.414       | 0.302    | 0.284     | 0.039           | 0.057    | 0.045     |
| Mesopotamia PPN       | 6.81E-07 | 0.651       | 0.355    | -0.006    | 0.053           | 0.091    | 0.058              | 6.33E-04 | 0.530       | 0.159    | 0.311     | 0.052           | 0.085    | 0.051     |
| TUR C AşıklıHöyük PPN | 8.99E-01 | 0.125       | 0.412    | 0.463     | 0.045           | 0.108    | 0.096              | 1.62E-01 | 0.224       | 0.214    | 0.562     | 0.072           | 0.177    | 0.139     |
| TUR C Boncuklu PPN    | 8.42E-01 | 0.133       | 0.034    | 0.833     | 0.031           | 0.065    | 0.061              | 1.25E-01 | 0.135       | -0.031   | 0.896     | 0.037           | 0.075    | 0.066     |
| TUR C Çatalhöyük N    | 8.65E-01 | 0.176       | 0.508    | 0.316     | 0.025           | 0.048    | 0.043              | 1.97E-02 | 0.209       | 0.412    | 0.379     | 0.032           | 0.064    | 0.050     |
| TUR Marmara Barcin N  | 1.13E-03 | 0.176       | 0.212    | 0.612     | 0.023           | 0.045    | 0.042              | 1.42E-02 | 0.113       | 0.191    | 0.696     | 0.026           | 0.049    | 0.046     |

**Table S 4 Differentiating between CHG and IRN\_Ganj\_Dareh\_N ancestry.** The two models are fit with one of CHG, IRN\_Ganj\_Dareh\_N as a source and the other as an outgroup.

| Test                  | P-value  | Proportions |                 |           | Standard Errors |                 |           |
|-----------------------|----------|-------------|-----------------|-----------|-----------------|-----------------|-----------|
|                       |          | Levant PPN  | Mesopotamia PPN | Pınarbaşı | Levant PPN      | Mesopotamia PPN | Pınarbaşı |
| ALB N                 | 6.24E-01 | 0.12        | 0.424           | 0.456     | 0.084           | 0.122           | 0.108     |
| ARM Aknashen N        | 8.27E-01 | -0.051      | 1.033           | 0.019     | 0.066           | 0.069           | 0.081     |
| ARM Masis Blur N      | 9.10E-01 | -0.042      | 0.846           | 0.196     | 0.068           | 0.084           | 0.077     |
| AZE N                 | 7.37E-01 | 0.016       | 0.891           | 0.093     | 0.043           | 0.049           | 0.05      |
| CYP PPNB              | 1.18E-01 | 0.229       | 0.252           | 0.519     | 0.116           | 0.186           | 0.122     |
| IRN_Ganj_Dareh_N      | 1.68E-06 | -0.133      | 1.488           | -0.355    | 0.06            | 0.063           | 0.073     |
| IRQ Bestansur PPN     | 6.10E-01 | -0.25       | 1.23            | 0.02      | 0.534           | 0.374           | 0.304     |
| IRQ Shanidar N        | 8.66E-01 | -0.007      | 1.205           | -0.198    | 0.096           | 0.095           | 0.127     |
| Mesopotamia LBA       | 3.98E-01 | 0.096       | 0.887           | 0.017     | 0.052           | 0.06            | 0.061     |
| TUR C AşıklıHöyük PPN | 1.62E-01 | 0           | 0.697           | 0.303     | 0.085           | 0.132           | 0.108     |
| TUR C Boncuklu PPN    | 4.56E-01 | -0.047      | 0.296           | 0.751     | 0.043           | 0.064           | 0.058     |
| TUR C Çatalhöyük N    | 1.55E-01 | 0.166       | 0.559           | 0.275     | 0.046           | 0.059           | 0.05      |
| TUR Marmara Barcin N  | 2.71E-01 | 0.128       | 0.268           | 0.604     | 0.033           | 0.045           | 0.042     |

**Table S 5 Differentiating between Levantine and Mesopotamian PPN ancestry in Anatolia.** These proportions are visualized in Fig. 3D

1. I. Lazaridis *et al.*, Genomic insights into the origin of farming in the ancient Near East. *Nature* **536**, 419-424 (2016).
2. I. Mathieson *et al.*, Genome-wide patterns of selection in 230 ancient Eurasians. *Nature* **528**, 499-503 (2015).
3. F. Broushaki *et al.*, Early Neolithic genomes from the eastern Fertile Crescent. *Science* **353**, 499 (2016).
4. Z. Hofmanová *et al.*, Early farmers from across Europe directly descended from Neolithic Aegeans. *Proceedings of the National Academy of Sciences* **113**, 6886 (2016).
5. G. M. Kilinc *et al.*, The Demographic Development of the First Farmers in Anatolia. *Curr Biol* **26**, 2659-2666 (2016).
6. M. Feldman *et al.*, Late Pleistocene human genome suggests a local origin for the first farmers of central Anatolia. *Nature Communications* **10**, 1218 (2019).
7. E. Skourtanioti *et al.*, Genomic History of Neolithic to Bronze Age Anatolia, Northern Levant, and Southern Caucasus. *Cell* **181**, 1158-1175.e1128 (2020).
8. R. Yaka *et al.*, Variable kinship patterns in Neolithic Anatolia revealed by ancient genomes. *Current Biology*, (2021).
9. M. Gallego-Llorente *et al.*, The genetics of an early Neolithic pastoralist from the Zagros, Iran. *Scientific Reports* **6**, 31326 (2016).
10. E. R. Jones *et al.*, Upper Palaeolithic genomes reveal deep roots of modern Eurasians. *Nature Communications* **6**, 8912 (2015).
11. M. Narasimhan Vagheesh *et al.*, The formation of human populations in South and Central Asia. *Science* **365**, eaat7487 (2019).
12. I. Lazaridis, S. Alpaslan-Roodenberg *et al.*, The genetic history of the Southern Arc: a bridge between West Asia and Europe (*in submission*), (2022).
13. E. Asouti, Beyond the Pre-Pottery Neolithic B interaction sphere. *Journal of World Prehistory* **20**, 87-126 (2006).
14. J. Cauvin, *Naissance des divinités, naissance de l'agriculture: la révolution des symboles au néolithique*. Empreintes de l'homme (CNRS Éditions, Paris, 1997).
15. E. Peltenburg, The colonisation and settlement of Cyprus. *Investigations at Kissonerga-Mylothkia, 1976-1996*, (2003).
16. N. Patterson, A. L. Price, D. Reich, Population Structure and Eigenanalysis. *PLOS Genetics* **2**, e190 (2006).
17. I. Lazaridis *et al.*, Ancient human genomes suggest three ancestral populations for present-day Europeans. *Nature* **513**, 409-413 (2014).
18. W. Haak *et al.*, Massive migration from the steppe was a source for Indo-European languages in Europe. *Nature* **522**, 207-211 (2015).
19. I. Mathieson *et al.*, The genomic history of southeastern Europe. *Nature* **555**, 197-203 (2018).
20. H. Simmons Alan, D. Mandel Rolfe, How Old Is the Human Presence on Cyprus? *Science* **317**, 1679-1679 (2007).
21. D. Stordeur, in *Bulletin de Correspondance Hellenique*. (2003), pp. 353-371.
22. E. Peltenburg, *The Colonisation and Settlement of Cyprus: Investigations at Kissonerga-Mylothkia, 1976-1996*. E. Peltenburg, Ed., LAP (2003), vol. III.
23. Detailed information is provided in the supplementary materials

24. E. Fernández *et al.*, Ancient DNA Analysis of 8000 B.C. Near Eastern Farmers Supports an Early Neolithic Pioneer Maritime Colonization of Mainland Europe through Cyprus and the Aegean Islands. *PLOS Genetics* **10**, e1004401 (2014).
25. N. Patterson *et al.*, Large-scale migration into Britain during the Middle to Late Bronze Age. *Nature* **601**, 588-594 (2022).
26. I. Lazaridis, S. Alpaslan-Roodenberg *et al.*, A genetic probe into the ancient and medieval history of Southern Europe and West Asia. (*in submission*), (2022).
27. S. Alpaslan-Roodenberg *et al.*, Ethics of DNA research on human remains: five globally applicable guidelines. *Nature* **599**, 41-46 (2021).
28. É. Harney *et al.*, Ancient DNA from Chalcolithic Israel reveals the role of population mixture in cultural transformation. *Nature Communications* **9**, 3336 (2018).
29. W. Haak *et al.*, Massive migration from the steppe was a source for Indo-European languages in Europe. *Nature* **522**, 207-211 (2015).
30. S. Mallick *et al.*, The Simons Genome Diversity Project: 300 genomes from 142 diverse populations. *Nature* **538**, 201-206 (2016).
31. E. R. Jones *et al.*, Upper Palaeolithic genomes reveal deep roots of modern Eurasians. *Nat Commun* **6**, 8912 (2015).
32. M. van de Loosdrecht *et al.*, Pleistocene North African genomes link Near Eastern and sub-Saharan African human populations. *Science*, (2018).
33. Q. Fu *et al.*, The genetic history of Ice Age Europe. *Nature* **534**, 200-205 (2016).
34. I. Olalde *et al.*, Derived immune and ancestral pigmentation alleles in a 7,000-year-old Mesolithic European. *Nature* **507**, 225-228 (2014).
35. M. van de Loosdrecht *et al.*, Pleistocene North African genomes link Near Eastern and sub-Saharan African human populations. *Science* **360**, 548 (2018).
36. M. Raghavan *et al.*, Upper Palaeolithic Siberian genome reveals dual ancestry of Native Americans. *Nature* **505**, 87-91 (2014).
